# Supplementary material
Source: PubMed Central journal article supplement (PMC7213565)
Supplement: jiz685_suppl_supplementary_tables.pdf [file jiz685_suppl_supplementary_tables.pdf]

| Supplemental Table 1 | Gene Symbol   | p-value                              | Fold-Change                          | p-value  | Fold-Change                          | p-value  | Fold-Change                          | p-value | Fold-Change                          | direction | sig | >3                                                                       | gene title |
|----------------------|---------------|--------------------------------------|--------------------------------------|----------|--------------------------------------|----------|--------------------------------------|---------|--------------------------------------|-----------|-----|--------------------------------------------------------------------------|------------|
|                      |               | (CD8IL13+ vs. CD8IL13- and allo CD8) | (CD8IL13+ vs. CD8IL13- and allo CD8) |          | (CD8IL13+ vs. CD8IL13- and allo CD8) |          | (CD8IL13+ vs. CD8IL13- and allo CD8) |         | (CD8IL13+ vs. CD8IL13- and allo CD8) |           |     |                                                                          |            |
|                      | 1810011H1Rik  | 1.52E-15                             | 22.31                                | 2.12E-15 | 24.85                                | 8.19E-14 | 20.03                                | Y       | 1                                    | 1         | 1   | RIKEN cDNA 1810011H11 gene (uncharacterized protein LOC69069 precursor)  |            |
|                      | Pecam1        | 1.08E-03                             | 11.02                                | 1.84E-03 | 10.74                                | 5.66E-03 | 11.31                                | Y       | 1                                    | 1         | 1   | platelet/endothelial cell adhesion molecule 1                            |            |
|                      | Amelx         | 8.75E-12                             | 10.68                                | 1.57E-10 | 7.75                                 | 4.13E-11 | 14.71                                | Y       | 1                                    | 1         | 1   | amelogenin X chromosome                                                  |            |
|                      | Sulf2         | 1.84E-06                             | 10.10                                | 2.14E-04 | 4.84                                 | 1.12E-06 | 21.07                                | Y       | 1                                    | 1         | 1   | sulfatase 2                                                              |            |
|                      | Tnfrsf11b     | 1.34E-09                             | 9.19                                 | 4.03E-06 | 3.54                                 | 2.42E-10 | 23.83                                | Y       | 1                                    | 1         | 1   | tumor necrosis factor receptor superfamily, member 11b (osteoprotegerin) |            |
|                      | Ccr8          | 2.15E-08                             | 8.90                                 | 4.58E-08 | 8.89                                 | 4.49E-07 | 8.91                                 | Y       | 1                                    | 1         | 1   | chemokine (C-C motif) receptor 8                                         |            |
|                      | Prl2c5        | 9.94E-05                             | 8.88                                 | 2.06E-04 | 8.54                                 | 7.44E-04 | 9.24                                 | Y       | 1                                    | 1         | 1   | prolactin family 2, subfamily c, member 5                                |            |
|                      | Ctss          | 1.68E-05                             | 8.74                                 | 4.02E-04 | 5.33                                 | 2.32E-05 | 14.34                                | Y       | 1                                    | 1         | 1   | cathepsin 5                                                              |            |
|                      | 2810055G20Rik | 2.58E-04                             | 8.74                                 | 3.39E-03 | 5.36                                 | 3.45E-04 | 14.25                                | Y       | 1                                    | 1         | 1   | RIKEN cDNA 2810055G20 gene                                               |            |
|                      | Hpgds         | 1.20E-04                             | 8.11                                 | 4.49E-04 | 6.86                                 | 5.25E-04 | 9.60                                 | Y       | 1                                    | 1         | 1   | hematopoietic prostaglandin D synthase                                   |            |
|                      | Arntl         | 5.51E-07                             | 6.84                                 | 3.00E-08 | 12.80                                | 5.00E-04 | 3.65                                 | Y       | 1                                    | 1         | 1   | aryl hydrocarbon receptor nuclear translocator-like                      |            |
|                      | Gm9766        | 7.67E-05                             | 6.79                                 | 7.61E-04 | 4.88                                 | 1.63E-04 | 9.44                                 | Y       | 1                                    | 1         | 1   | predicted gene 9766                                                      |            |
|                      | Eml1          | 1.45E-07                             | 6.46                                 | 2.66E-06 | 4.77                                 | 4.21E-07 | 8.76                                 | Y       | 1                                    | 1         | 1   | echinoderm microtubule associated protein like 1                         |            |
|                      | Cd4           | 3.17E-05                             | 6.39                                 | 2.04E-04 | 5.12                                 | 1.11E-04 | 7.98                                 | Y       | 1                                    | 1         | 1   | CD4 antigen                                                              |            |
|                      | Dclk3         | 8.80E-12                             | 6.20                                 | 3.77E-11 | 5.73                                 | 1.37E-10 | 6.72                                 | Y       | 1                                    | 1         | 1   | doublecortin-like kinase 3                                               |            |
|                      | Sla           | 1.02E-04                             | 5.94                                 | 1.20E-04 | 6.39                                 | 1.24E-03 | 5.52                                 | Y       | 1                                    | 1         | 1   | src-like adaptor                                                         |            |
|                      | Epdr1         | 1.36E-04                             | 5.59                                 | 2.33E-04 | 5.60                                 | 1.13E-03 | 5.59                                 | Y       | 1                                    | 1         | 1   | ependymin related protein 1 (zebrafish)                                  |            |
|                      | Mtmr7         | 8.29E-09                             | 5.40                                 | 5.86E-09 | 6.24                                 | 5.72E-07 | 4.67                                 | Y       | 1                                    | 1         | 1   | myotubularin related protein 7                                           |            |
|                      | 2810055G20Rik | 1.19E-03                             | 5.28                                 | 8.15E-03 | 3.84                                 | 1.91E-03 | 7.26                                 | Y       | 1                                    | 1         | 1   | RIKEN cDNA 2810055G20 gene                                               |            |
|                      | Gabra1        | 5.51E-04                             | 4.90                                 | 5.97E-04 | 5.30                                 | 5.01E-03 | 4.54                                 | Y       | 1                                    | 1         | 1   | gamma-aminobutyric acid (GABA) A receptor, subunit alpha 1               |            |
|                      | Impact        | 1.31E-08                             | 4.44                                 | 3.21E-05 | 2.30                                 | 2.22E-09 | 8.56                                 | Y       | 1                                    | 1         | 1   | imprinted and ancient                                                    |            |
|                      | Csf2          | 2.84E-04                             | 4.30                                 | 5.20E-03 | 2.92                                 | 2.86E-04 | 6.33                                 | Y       | 1                                    | 1         | 1   | colony stimulating factor 2 (granulocyte-macrophage)                     |            |
|                      | Abca5         | 9.72E-10                             | 4.14                                 | 5.34E-11 | 6.35                                 | 2.23E-06 | 2.70                                 | Y       | 1                                    | 1         | 1   | ATP-binding cassette, sub-family A (ABC1), member 5                      |            |
|                      | Yipf6         | 6.19E-15                             | 4.02                                 | 3.13E-04 | 1.25                                 | 2.39E-17 | 12.91                                | Y       | 1                                    | 1         | 1   | Yip1 domain family, member 6                                             |            |
|                      | Lrrc49        | 1.69E-11                             | 3.99                                 | 2.44E-07 | 2.07                                 | 1.84E-12 | 7.70                                 | Y       | 1                                    | 1         | 1   | leucine rich repeat containing 49                                        |            |
|                      | 4930506M07Rik | 2.86E-07                             | 3.98                                 | 4.04E-07 | 4.15                                 | 7.07E-06 | 3.82                                 | Y       | 1                                    | 1         | 1   | RIKEN cDNA 4930506M07 gene                                               |            |
|                      | Ptprc         | 4.77E-08                             | 3.94                                 | 2.54E-04 | 1.99                                 | 4.92E-09 | 7.80                                 | Y       | 1                                    | 1         | 1   | protein tyrosine phosphatase, receptor type, E                           |            |
|                      | Mirlet7c-1    | 1.63E-03                             | 3.79                                 | 5.34E-03 | 3.31                                 | 4.49E-03 | 4.34                                 | Y       | 1                                    | 1         | 1   | microRNA let7c-1                                                         |            |
|                      | Mir99a        | 1.07E-03                             | 3.65                                 | 7.08E-03 | 2.88                                 | 1.81E-03 | 4.64                                 | Y       | 1                                    | 1         | 1   | microRNA 99a                                                             |            |
|                      | Farp1         | 2.16E-06                             | 3.57                                 | 3.64E-08 | 6.42                                 | 6.53E-03 | 1.98                                 | Y       | 1                                    | 1         | 1   | FERM, RhoGEF (Arhgef) and pleckstrin domain protein 1 (chondrocyt        |            |
|                      | LOC280487     | 2.27E-06                             | 3.48                                 | 6.69E-05 | 2.65                                 | 3.52E-06 | 4.58                                 | Y       | 1                                    | 1         | 1   | pol polyprotein                                                          |            |
|                      | LOC280487     | 2.27E-06                             | 3.48                                 | 6.69E-05 | 2.65                                 | 3.52E-06 | 4.58                                 | Y       | 1                                    | 1         | 1   | pol polyprotein                                                          |            |
|                      | Mir23b        | 2.60E-05                             | 3.42                                 | 1.66E-03 | 2.30                                 | 1.62E-05 | 5.08                                 | Y       | 1                                    | 1         | 1   | microRNA 23b                                                             |            |
|                      | Mir155        | 3.93E-06                             | 3.41                                 | 6.98E-05 | 2.72                                 | 8.35E-06 | 4.28                                 | Y       | 1                                    | 1         | 1   | microRNA 155                                                             |            |
|                      | Mapk8         | 1.91E-04                             | 3.35                                 | 7.35E-04 | 3.01                                 | 7.43E-04 | 3.73                                 | Y       | 1                                    | 1         | 1   | mitogen-activated protein kinase 8                                       |            |
|                      | Pank1         | 6.87E-06                             | 3.28                                 | 8.63E-05 | 2.70                                 | 1.77E-05 | 3.97                                 | Y       | 1                                    | 1         | 1   | pantothenate kinase 1                                                    |            |
|                      | Bicd1         | 1.24E-09                             | 3.23                                 | 3.79E-09 | 3.14                                 | 2.22E-08 | 3.32                                 | Y       | 1                                    | 1         | 1   | bicaudal D homolog 1 (Drosophila)                                        |            |
|                      | Spry2         | 2.29E-09                             | 3.21                                 | 1.10E-07 | 2.52                                 | 4.34E-09 | 4.10                                 | Y       | 1                                    | 1         | 1   | sprouty homolog 2 (Drosophila)                                           |            |
|                      | Pbxip1        | 2.22E-08                             | 3.20                                 | 5.00E-06 | 2.23                                 | 1.36E-08 | 4.61                                 | Y       | 1                                    | 1         | 1   | pre-B-cell leukemia transcription factor interacting protein 1 /         |            |
|                      | Mir18         | 4.02E-05                             | 3.15                                 | 1.31E-03 | 2.31                                 | 3.80E-05 | 4.30                                 | Y       | 1                                    | 1         | 1   | microRNA 18                                                              |            |
|                      | Agap1         | 5.97E-05                             | 3.11                                 | 7.70E-04 | 2.50                                 | 1.08E-04 | 3.88                                 | Y       | 1                                    | 1         | 1   | ArfGAP with GTPase domain, ankyrin repeat and PH domain 1                |            |
|                      | S1pr3         | 1.63E-04                             | 3.09                                 | 1.81E-03 | 2.47                                 | 2.73E-04 | 3.85                                 | Y       | 1                                    | 1         | 1   | sphingosine-1-phosphate receptor 3                                       |            |
|                      | Gm5785        | 5.61E-05                             | 3.08                                 | 2.75E-04 | 2.76                                 | 2.25E-04 | 3.45                                 | Y       | 1                                    | 1         | 1   | predicted gene 5785                                                      |            |
|                      | Tnfrsf13b     | 2.26E-09                             | 3.00                                 | 1.95E-10 | 4.00                                 | 2.43E-06 | 2.25                                 | Y       | 1                                    | 1         | 1   | tumor necrosis factor (ligand) superfamily, member 13b                   |            |
|                      | Mir19b-1      | 4.07E-04                             | 2.98                                 | 3.44E-03 | 2.43                                 | 7.05E-04 | 3.66                                 | Y       | 1                                    | 1         | 1   | microRNA 19b-1                                                           |            |
|                      | Akr1c12       | 5.34E-10                             | 2.96                                 | 1.78E-12 | 5.54                                 | 3.06E-04 | 1.58                                 | Y       | 1                                    | 1         | 1   | aldo-keto reductase family 1, member C12                                 |            |
|                      | Fut8          | 1.96E-10                             | 2.92                                 | 1.93E-03 | 1.33                                 | 2.11E-12 | 6.43                                 | Y       | 1                                    | 1         | 1   | fucosyltransferase 8                                                     |            |
|                      | Lair1         | 1.11E-05                             | 2.91                                 | 3.11E-05 | 2.80                                 | 9.31E-05 | 3.03                                 | Y       | 1                                    | 1         | 1   | leukocyte-associated Ig-like receptor 1                                  |            |
|                      | B930095G15Rik | 4.77E-05                             | 2.89                                 | 5.13E-06 | 3.95                                 | 6.75E-03 | 2.11                                 | Y       | 1                                    | 1         | 1   | RIKEN cDNA B930095G15 gene                                               |            |
|                      | Mir92-1       | 2.14E-04                             | 2.83                                 | 3.45E-03 | 2.20                                 | 2.52E-04 | 3.64                                 | Y       | 1                                    | 1         | 1   | microRNA 92-1                                                            |            |
|                      | Cd81          | 3.65E-04                             | 2.79                                 | 3.17E-04 | 3.01                                 | 4.43E-03 | 2.58                                 | Y       | 1                                    | 1         | 1   | CD81 antigen                                                             |            |
|                      | Mical2        | 6.18E-04                             | 2.73                                 | 5.44E-03 | 2.23                                 | 9.43E-04 | 3.35                                 | Y       | 1                                    | 1         | 1   | microtubule associated monooxygenase, calponin and LIM domain            |            |
|                      | Rab4a         | 6.04E-05                             | 2.67                                 | 3.80E-03 | 1.91                                 | 3.23E-05 | 3.74                                 | Y       | 1                                    | 1         | 1   | RAB4A, member RAS oncogene family                                        |            |
|                      | Tarbp1        | 3.30E-05                             | 2.66                                 | 1.11E-05 | 3.14                                 | 1.63E-03 | 2.26                                 | Y       | 1                                    | 1         | 1   | TAR (HIV-1) RNA binding protein 1                                        |            |
|                      | Wsb2          | 4.62E-06                             | 2.60                                 | 3.06E-03 | 1.67                                 | 8.03E-07 | 4.05                                 | Y       | 1                                    | 1         | 1   | WD repeat and SOCS box-containing 2                                      |            |
|                      | Xlrf4c        | 6.02E-10                             | 2.58                                 | 4.52E-08 | 2.08                                 | 8.94E-10 | 3.21                                 | Y       | 1                                    | 1         | 1   | X-linked lymphocyte-regulated 4C                                         |            |
|                      | Xlrf4b        | 2.84E-10                             | 2.51                                 | 2.83E-08 | 2.01                                 | 3.63E-10 | 3.14                                 | Y       | 1                                    | 1         | 1   | X-linked lymphocyte-regulated 4B                                         |            |
|                      | Auh           | 5.62E-05                             | 2.40                                 | 4.31E-03 | 1.75                                 | 2.63E-05 | 3.28                                 | Y       | 1                                    | 1         | 1   | AU RNA binding protein/enoyl-coenzyme A hydratase                        |            |
|                      | Nfkb1         | 2.55E-15                             | 2.37                                 | 4.65E-12 | 1.73                                 | 8.18E-16 | 3.25                                 | Y       | 1                                    | 1         | 1   | nuclear factor of kappa light polypeptide gene enhancer in B-cell        |            |
|                      | Camk2b        | 4.86E-07                             | 2.34                                 | 1.38E-04 | 1.72                                 | 1.95E-07 | 3.18                                 | Y       | 1                                    | 1         | 1   | calcium/calmodulin-dependent protein kinase II, beta                     |            |
|                      | Setd7         | 7.02E-08                             | 2.31                                 | 1.35E-04 | 1.59                                 | 1.17E-08 | 3.35                                 | Y       | 1                                    | 1         | 1   | SET domain containing (lysine methyltransferase) 7                       |            |
|                      | Tmem140       | 7.37E-07                             | 2.23                                 | 1.92E-03 | 1.48                                 | 7.75E-08 | 3.35                                 | Y       | 1                                    | 1         | 1   | transmembrane protein 140                                                |            |
|                      | Psbm10        | 1.28E-07                             | 2.22                                 | 1.88E-03 | 1.41                                 | 7.13E-09 | 3.49                                 | Y       | 1                                    | 1         | 1   | proteasome (prosome, macropain) subunit, beta type 10                    |            |
|                      | Rbak          | 3.24E-09                             | 2.00                                 | 3.91E-04 | 1.31                                 | 1.14E-10 | 3.05                                 | Y       | 1                                    | 1         | 1   | RB-associated KRAB repressor                                             |            |
|                      | Ipmk          | 4.47E-12                             | -1.85                                | 2.16E-03 | -1.13                                | 2.58E-14 | -3.03                                | Y       | 1                                    | 1         | 1   | inositol polyphosphate multikinase                                       |            |
|                      | Retsat        | 2.40E-08                             | -2.03                                | 6.01E-04 | -1.36                                | 1.30E-09 | -3.04                                | Y       | 1                                    | 1         | 1   | retinol saturase (all trans retinol 13,14 reductase)                     |            |
|                      | Maged2        | 5.07E-08                             | -2.04                                | 7.90E-04 | -1.37                                | 3.12E-09 | -3.03                                | Y       | 1                                    | 1         | 1   | melanoma antigen, family D, 2                                            |            |
|                      | Haus8         | 2.18E-06                             | -2.17                                | 6.76E-03 | -1.41                                | 1.73E-07 | -3.32                                | Y       | 1                                    | 1         | 1   | 4HAUS augmin-like complex, subunit 8                                     |            |
|                      | Sqle          | 4.45E-06                             | -2.21                                | 6.38E-03 | -1.46                                | 4.83E-07 | -3.33                                | Y       | 1                                    | 1         | 1   | squalene epoxidase                                                       |            |
|                      | Lrrc42        | 4.13E-10                             | -2.29                                | 2.59E-07 | -1.72                                | 1.75E-10 | -3.05                                | Y       | 1                                    | 1         | 1   | leucine rich repeat containing 42                                        |            |
|                      | Dci           | 8.31E-07                             | -2.30                                | 1.40E-08 | -3.35                                | 3.36E-03 | -1.58                                | Y       | 1                                    | 1         | 1   | dodecenoyl-Coenzyme A delta isomerase (3,2 trans-enoyl-Coenzyme A is     |            |
|                      | Sp140         | 1.91E-09                             | -2.31                                | 4.12E-12 | -3.91                                | 2.08E-03 | -1.36                                | Y       | 1                                    | 1         | 1   | Sp140 nuclear body protein                                               |            |
|                      | Rhobtb3       | 9.03E-08                             | -2.32                                | 4.24E-05 | -1.70                                | 3.19E-08 | -3.17                                | Y       | 1                                    | 1         | 1   | Rho-related BTB domain containing 3                                      |            |
|                      | Cep72         | 5.98E-05                             | -2.40                                | 5.02E-03 | -1.74                                | 2.58E-05 | -3.31                                | Y       | 1                                    | 1         | 1   | centrosomal protein 72                                                   |            |
|                      | Phf11         | 5.19E-10                             | -2.42                                | 7.10E-06 | -1.57                                | 4.98E-11 | -3.75                                | Y       | 1                                    | 1         | 1   | PHD finger protein 11                                                    |            |
|                      | Bcat2         | 4.62E-10                             | -2.44                                | 1.88E-06 | -1.65                                | 7.62E-11 | -3.61                                | Y       | 1                                    | 1         | 1   | branched chain aminotransferase 2, mitochondrial                         |            |
|                      | Pgp           | 1.25E-05                             | -2.45                                | 9.96E-04 | -1.83                                | 7.54E-06 | -3.27                                | Y       | 1                                    | 1         | 1   | phosphoglycolate phosphatase                                             |            |
|                      | Grhpr         | 2.23E-05                             | -2.46                                | 6.26E-03 | -1.65                                | 5.01E-06 | -3.67                                | Y       | 1                                    | 1         | 1   | glyoxylate reductase/hydroxypyruvate reductase                           |            |

|               |          |       |          |       |          |        |   |   |   |                                                                 |
|---------------|----------|-------|----------|-------|----------|--------|---|---|---|-----------------------------------------------------------------|
| Bard1         | 1.51E-04 | -2.47 | 9.27E-03 | -1.77 | 6.70E-05 | -3.46  | Y | 1 | 1 | BRCA1 associated RING domain 1                                  |
| Cdc25b        | 3.22E-04 | -2.53 | 2.97E-03 | -2.12 | 5.47E-04 | -3.03  | Y | 1 | 1 | cell division cycle 25 homolog B (S. pombe)                     |
| Scp2          | 4.80E-06 | -2.54 | 3.31E-03 | -1.64 | 8.05E-07 | -3.93  | Y | 1 | 1 | sterol carrier protein 2, liver                                 |
| Fam117b       | 6.08E-06 | -2.55 | 2.35E-04 | -2.01 | 6.81E-06 | -3.23  | Y | 1 | 1 | family with sequence similarity 117, member B                   |
| Hist1h4f      | 7.71E-04 | -2.57 | 5.56E-03 | -2.15 | 1.32E-03 | -3.05  | Y | 1 | 1 | histone cluster 1, H4f                                          |
| Hist1h2ak     | 3.65E-04 | -2.57 | 4.10E-03 | -2.09 | 5.14E-04 | -3.16  | Y | 1 | 1 | histone cluster 1, H2ak                                         |
| Abi3          | 1.64E-04 | -2.58 | 1.25E-03 | -2.22 | 3.74E-04 | -3.00  | Y | 1 | 1 | ABI gene family, member 3                                       |
| Usp28         | 9.19E-08 | -2.59 | 8.04E-09 | -3.35 | 6.11E-05 | -2.00  | Y | 1 | 1 | ubiquitin specific peptidase 28                                 |
| Hist1h3g      | 5.76E-04 | -2.62 | 4.51E-03 | -2.19 | 9.85E-04 | -3.14  | Y | 1 | 1 | histone cluster 1, H3g                                          |
| Hist1h3a      | 5.15E-04 | -2.63 | 4.11E-03 | -2.19 | 8.87E-04 | -3.15  | Y | 1 | 1 | histone cluster 1, H3a                                          |
| Hist1h3h      | 5.48E-04 | -2.63 | 4.30E-03 | -2.20 | 9.45E-04 | -3.15  | Y | 1 | 1 | histone cluster 1, H3h                                          |
| Hist1h3i      | 5.82E-04 | -2.67 | 4.44E-03 | -2.22 | 1.01E-03 | -3.20  | Y | 1 | 1 | histone cluster 1, H3i                                          |
| Hist1h3d      | 5.41E-04 | -2.68 | 4.17E-03 | -2.24 | 9.50E-04 | -3.22  | Y | 1 | 1 | histone cluster 1, H3d                                          |
| Hist1h3b      | 5.15E-04 | -2.69 | 4.05E-03 | -2.24 | 9.01E-04 | -3.24  | Y | 1 | 1 | histone cluster 1, H3b                                          |
| Gm13154       | 2.20E-04 | -2.71 | 1.12E-03 | -2.40 | 6.57E-04 | -3.06  | Y | 1 | 1 | predicted gene 13154                                            |
| Hist1h3e      | 4.92E-04 | -2.72 | 3.93E-03 | -2.26 | 8.58E-04 | -3.27  | Y | 1 | 1 | histone cluster 1, H3e                                          |
| Hist1h3c      | 5.43E-04 | -2.72 | 4.15E-03 | -2.27 | 9.60E-04 | -3.27  | Y | 1 | 1 | histone cluster 1, H3c                                          |
| Dag1          | 3.15E-04 | -2.73 | 5.31E-03 | -2.11 | 3.30E-04 | -3.54  | Y | 1 | 1 | dystroglycan 1                                                  |
| Psrc1         | 1.01E-05 | -2.75 | 6.88E-03 | -1.67 | 1.48E-06 | -4.50  | Y | 1 | 1 | proline/serine-rich coiled-coil 1                               |
| Hicb          | 1.96E-11 | -2.75 | 2.38E-09 | -2.14 | 2.41E-11 | -3.53  | Y | 1 | 1 | 3-hydroxyisobutyryl-Coenzyme A hydrolase                        |
| Hist3h2ba     | 2.81E-07 | -2.75 | 7.22E-06 | -2.27 | 6.01E-07 | -3.34  | Y | 1 | 1 | histone cluster 3, H2ba                                         |
| Hist2h3c1     | 4.57E-04 | -2.75 | 4.10E-03 | -2.25 | 7.36E-04 | -3.36  | Y | 1 | 1 | histone cluster 2, H3c1                                         |
| Hist2h3b      | 4.12E-04 | -2.76 | 3.56E-03 | -2.28 | 7.02E-04 | -3.36  | Y | 1 | 1 | histone cluster 2, H3b                                          |
| Mettl7a1      | 1.64E-04 | -2.81 | 6.77E-05 | -3.31 | 4.66E-03 | -2.39  | Y | 1 | 1 | methyltransferase like 7A1                                      |
| Mki67         | 1.01E-03 | -2.81 | 8.00E-03 | -2.28 | 1.49E-03 | -3.48  | Y | 1 | 1 | antigen identified by monoclonal antibody Ki 67                 |
| Akr1b10       | 7.95E-06 | -2.82 | 2.06E-06 | -3.43 | 6.85E-04 | -2.32  | Y | 1 | 1 | aldo-keto reductase family 1, member B10 (aldose reductase)     |
| Cdc20         | 5.01E-04 | -2.86 | 9.51E-03 | -2.11 | 4.27E-04 | -3.87  | Y | 1 | 1 | cell division cycle 20 homolog (S. cerevisiae)                  |
| Elf4ebp1      | 3.75E-06 | -2.90 | 3.00E-04 | -2.10 | 2.68E-06 | -4.00  | Y | 1 | 1 | eukaryotic translation initiation factor 4E binding protein 1   |
| Insl6         | 7.25E-04 | -2.92 | 3.34E-03 | -2.54 | 1.83E-03 | -3.35  | Y | 1 | 1 | insulin-like 6                                                  |
| Larp1b        | 8.15E-14 | -2.93 | 9.42E-12 | -2.27 | 1.14E-13 | -3.77  | Y | 1 | 1 | La ribonucleoprotein domain family, member 1B                   |
| Wdr54         | 1.67E-08 | -2.93 | 8.70E-06 | -1.99 | 6.39E-09 | -4.31  | Y | 1 | 1 | WD repeat domain 54                                             |
| Kif15         | 1.01E-03 | -2.94 | 3.15E-03 | -2.68 | 3.26E-03 | -3.23  | Y | 1 | 1 | kinesin family member 15                                        |
| Tmsb15l       | 2.06E-05 | -2.96 | 7.75E-06 | -3.50 | 1.01E-03 | -2.50  | Y | 1 | 1 | thymosin beta 15b like                                          |
| Qser1         | 2.45E-03 | -3.05 | 5.68E-03 | -2.85 | 8.13E-03 | -3.26  | Y | 1 | 1 | glutamine and serine rich 1                                     |
| Hvcn1         | 4.61E-08 | -3.05 | 5.26E-04 | -1.67 | 3.32E-09 | -5.56  | Y | 1 | 1 | hydrogen voltage-gated channel 1                                |
| D2Ert750e     | 2.23E-04 | -3.08 | 3.58E-03 | -2.34 | 2.61E-04 | -4.05  | Y | 1 | 1 | DNA segment, Chr 2, ERATO Doi 750, expressed                    |
| Fam38a        | 1.38E-06 | -3.08 | 5.20E-07 | -3.63 | 1.07E-04 | -2.62  | Y | 1 | 1 | family with sequence similarity 38, member A                    |
| Tfpi          | 1.58E-03 | -3.09 | 9.13E-03 | -2.53 | 2.73E-03 | -3.77  | Y | 1 | 1 | tissue factor pathway inhibitor                                 |
| E330013P04Rik | 5.45E-07 | -3.09 | 4.17E-05 | -2.27 | 5.05E-07 | -4.21  | Y | 1 | 1 | RIKEN cDNA E330013P04 gene                                      |
| Csnk1e        | 1.05E-06 | -3.11 | 7.57E-06 | -2.77 | 5.31E-06 | -3.51  | Y | 1 | 1 | casein kinase 1, epsilon                                        |
| AF529169      | 8.72E-08 | -3.12 | 1.27E-04 | -1.90 | 1.64E-08 | -5.13  | Y | 1 | 1 | cDNA sequence AF529169                                          |
| Stk38l        | 3.52E-09 | -3.14 | 1.82E-05 | -1.84 | 4.61E-10 | -5.33  | Y | 1 | 1 | serine/threonine kinase 38 like                                 |
| Gpsm2         | 3.55E-04 | -3.14 | 2.04E-03 | -2.67 | 8.72E-04 | -3.70  | Y | 1 | 1 | G-protein signalling modulator 2 (AGS3-like, C. elegans)        |
| Sema6d        | 5.33E-04 | -3.20 | 2.93E-04 | -3.72 | 8.74E-03 | -2.75  | Y | 1 | 1 | sema domain, transmembrane domain (TM), and cytoplasmic domain, |
| Tpmt          | 1.08E-11 | -3.21 | 1.60E-10 | -2.78 | 5.87E-11 | -3.71  | Y | 1 | 1 | thiopurine methyltransferase                                    |
| Ikzf3         | 4.26E-04 | -3.22 | 7.57E-04 | -3.18 | 2.70E-03 | -3.25  | Y | 1 | 1 | IKAROS family zinc finger 3                                     |
| Pde6d         | 3.21E-07 | -3.25 | 6.35E-07 | -3.26 | 5.69E-06 | -3.24  | Y | 1 | 1 | phosphodiesterase 6D, cGMP-specific, rod, delta                 |
| Il12rb2       | 1.33E-08 | -3.26 | 3.58E-07 | -2.64 | 3.48E-08 | -4.02  | Y | 1 | 1 | interleukin 12 receptor, beta 2                                 |
| Cenpm         | 7.72E-05 | -3.29 | 8.93E-04 | -2.63 | 1.45E-04 | -4.10  | Y | 1 | 1 | centromere protein M                                            |
| Dhcr7         | 7.05E-09 | -3.31 | 1.55E-04 | -1.73 | 4.57E-10 | -6.33  | Y | 1 | 1 | 7-dehydrocholesterol reductase                                  |
| Zfp781        | 3.59E-10 | -3.40 | 3.95E-12 | -5.90 | 1.62E-05 | -1.96  | Y | 1 | 1 | zinc finger protein 781                                         |
| Gyk           | 3.16E-08 | -3.44 | 6.06E-03 | -1.50 | 6.95E-10 | -7.91  | Y | 1 | 1 | glycerol kinase                                                 |
| Racgap1       | 1.92E-04 | -3.48 | 9.29E-04 | -3.03 | 6.19E-04 | -4.01  | Y | 1 | 1 | Rac GTPase-activating protein 1                                 |
| Cdkn3         | 9.75E-04 | -3.49 | 4.68E-03 | -2.93 | 2.21E-03 | -4.16  | Y | 1 | 1 | cyclin-dependent kinase inhibitor 3                             |
| 1700008I05Rik | 8.59E-09 | -3.57 | 7.55E-09 | -3.89 | 4.68E-07 | -3.27  | Y | 1 | 1 | RIKEN cDNA 1700008I05 gene                                      |
| Tdpoz4        | 7.11E-08 | -3.57 | 8.53E-07 | -3.03 | 3.05E-07 | -4.21  | Y | 1 | 1 | TD and POZ domain containing 4                                  |
| 4933436C20Rik | 1.74E-07 | -3.59 | 1.28E-06 | -3.17 | 1.03E-06 | -4.07  | Y | 1 | 1 | RIKEN cDNA 4933436C20 gene                                      |
| Uhfr1         | 4.04E-04 | -3.60 | 2.85E-03 | -2.90 | 8.16E-04 | -4.45  | Y | 1 | 1 | ubiquitin-like, containing PHD and RING finger domains, 1       |
| Pafah1b3      | 2.10E-07 | -3.67 | 3.91E-07 | -3.71 | 4.11E-06 | -3.64  | Y | 1 | 1 | platelet-activating factor acetylhydrolase, isoform 1b, subunit |
| Selm          | 1.34E-04 | -3.68 | 9.73E-03 | -2.23 | 5.41E-05 | -6.06  | Y | 1 | 1 | selenoprotein M                                                 |
| Rnpepl1       | 5.66E-05 | -3.72 | 4.75E-04 | -3.05 | 1.45E-04 | -4.54  | Y | 1 | 1 | arginyl aminopeptidase (aminopeptidase B)-like 1                |
| Ncaph         | 1.38E-03 | -3.73 | 5.86E-03 | -3.13 | 3.18E-03 | -4.44  | Y | 1 | 1 | non-SMC condensin I complex, subunit H                          |
| Top2a         | 5.59E-04 | -3.75 | 2.85E-03 | -3.14 | 1.37E-03 | -4.50  | Y | 1 | 1 | topoisomerase (DNA) II alpha                                    |
| Idh1          | 1.20E-06 | -3.76 | 1.66E-03 | -1.99 | 1.66E-07 | -7.10  | Y | 1 | 1 | isocitrate dehydrogenase 1 (NADP+), soluble                     |
| Aurkb         | 4.77E-04 | -3.77 | 7.19E-03 | -2.67 | 4.96E-04 | -5.32  | Y | 1 | 1 | aurora kinase B                                                 |
| Hsd11b1       | 1.94E-07 | -3.81 | 2.90E-06 | -3.12 | 6.45E-07 | -4.66  | Y | 1 | 1 | hydroxysteroid 11-beta dehydrogenase 1                          |
| Ckap2l        | 4.02E-04 | -3.81 | 3.45E-03 | -2.96 | 6.92E-04 | -4.91  | Y | 1 | 1 | cytoskeleton associated protein 2-like                          |
| Tmem180       | 3.81E-11 | -3.82 | 2.38E-08 | -2.44 | 1.76E-11 | -5.98  | Y | 1 | 1 | transmembrane protein 180                                       |
| Pecr          | 4.22E-07 | -3.82 | 6.04E-04 | -2.06 | 6.70E-08 | -7.07  | Y | 1 | 1 | peroxisomal trans-2-enoyl-CoA reductase                         |
| 2510002D24Rik | 6.13E-07 | -3.82 | 2.64E-05 | -2.79 | 8.36E-07 | -5.23  | Y | 1 | 1 | RIKEN cDNA 2510002D24 gene                                      |
| Sord          | 4.26E-07 | -3.87 | 6.60E-06 | -3.13 | 1.29E-06 | -4.79  | Y | 1 | 1 | sorbitol dehydrogenase                                          |
| Oxr1          | 2.32E-03 | -3.88 | 6.95E-03 | -3.41 | 6.29E-03 | -4.43  | Y | 1 | 1 | oxidation resistance 1                                          |
| Cyp4f39       | 1.03E-06 | -3.90 | 1.12E-07 | -5.58 | 3.48E-04 | -2.73  | Y | 1 | 1 | cytochrome P450, family 4, subfamily f, polypeptide 39          |
| Arhgap19      | 1.35E-04 | -3.92 | 1.65E-03 | -2.97 | 2.20E-04 | -5.17  | Y | 1 | 1 | Rho GTPase activating protein 19                                |
| Ube2c         | 1.46E-04 | -3.92 | 1.77E-03 | -2.97 | 2.34E-04 | -5.18  | Y | 1 | 1 | ubiquitin-conjugating enzyme E2C                                |
| Fbxo5         | 7.10E-04 | -3.92 | 2.84E-03 | -3.37 | 2.02E-03 | -4.57  | Y | 1 | 1 | F-box protein 5                                                 |
| Zdhhc23       | 4.83E-09 | -3.94 | 3.14E-03 | -1.53 | 8.65E-11 | -10.10 | Y | 1 | 1 | zinc finger, DHHC domain containing 23                          |
| Casc5         | 1.76E-03 | -3.94 | 9.91E-03 | -3.09 | 3.02E-03 | -5.02  | Y | 1 | 1 | cancer susceptibility candidate 5                               |
| Slc5a8        | 4.74E-16 | -3.94 | 3.97E-03 | -1.15 | 1.10E-18 | -13.57 | Y | 1 | 1 | solute carrier family 5 (iodide transporter), member 8          |
| Sord          | 4.75E-07 | -3.95 | 7.01E-06 | -3.20 | 1.47E-06 | -4.88  | Y | 1 | 1 | sorbitol dehydrogenase                                          |
| Fancd2        | 6.48E-04 | -3.97 | 8.88E-03 | -2.78 | 6.78E-04 | -5.67  | Y | 1 | 1 | Fanconi anemia, complementation group D2                        |
| Fam38a        | 1.82E-07 | -3.99 | 7.67E-08 | -4.78 | 1.65E-05 | -3.32  | Y | 1 | 1 | family with sequence similarity 38, member A                    |
| Lpin1         | 7.41E-08 | -4.04 | 1.45E-05 | -2.61 | 4.50E-08 | -6.26  | Y | 1 | 1 | lipin 1                                                         |
| Syt1          | 1.56E-10 | -4.05 | 1.65E-09 | -3.49 | 1.03E-09 | -4.70  | Y | 1 | 1 | synaptotagmin I                                                 |

|               |          |        |          |        |          |        |   |   |   |                                                                             |
|---------------|----------|--------|----------|--------|----------|--------|---|---|---|-----------------------------------------------------------------------------|
| Ndc80         | 7.20E-04 | -4.06  | 2.90E-03 | -3.47  | 2.03E-03 | -4.76  | Y | 1 | 1 | NDC80 homolog, kinetochore complex component ( <i>S. cerevisiae</i> )       |
| Tmbim4        | 2.77E-04 | -4.08  | 1.25E-04 | -5.04  | 6.36E-03 | -3.30  | Y | 1 | 1 | transmembrane BAX inhibitor motif containing 4                              |
| Ccnb1         | 2.48E-04 | -4.08  | 4.22E-03 | -2.86  | 2.72E-04 | -5.82  | Y | 1 | 1 | cyclin B1                                                                   |
| Ccnb1         | 2.58E-04 | -4.12  | 4.02E-03 | -2.92  | 3.01E-04 | -5.83  | Y | 1 | 1 | cyclin B1                                                                   |
| Sorcs1        | 7.93E-04 | -4.14  | 8.07E-04 | -4.48  | 6.95E-03 | -3.82  | Y | 1 | 1 | VPS10 domain receptor protein <i>SORCS</i> 1                                |
| Hist1h1b      | 5.14E-04 | -4.16  | 2.99E-03 | -3.36  | 1.15E-03 | -5.15  | Y | 1 | 1 | histone cluster 1, H1b                                                      |
| Depdc1a       | 1.09E-03 | -4.18  | 7.55E-03 | -3.18  | 1.76E-03 | -5.48  | Y | 1 | 1 | DEP domain containing 1a                                                    |
| Bard1         | 8.67E-05 | -4.23  | 3.65E-03 | -2.69  | 5.83E-05 | -6.67  | Y | 1 | 1 | BRCA1 associated RING domain 1                                              |
| Ccnb1         | 2.19E-04 | -4.23  | 3.44E-03 | -2.99  | 2.63E-04 | -5.99  | Y | 1 | 1 | cyclin B1                                                                   |
| Melk          | 6.86E-04 | -4.24  | 3.14E-03 | -3.53  | 1.76E-03 | -5.09  | Y | 1 | 1 | maternal embryonic leucine zipper kinase                                    |
| Rgs2          | 1.77E-06 | -4.26  | 1.06E-06 | -4.95  | 8.24E-05 | -3.66  | Y | 1 | 1 | regulator of G-protein signaling 2                                          |
| Casp12        | 3.49E-09 | -4.29  | 1.05E-07 | -3.30  | 9.03E-09 | -5.57  | Y | 1 | 1 | caspase 12                                                                  |
| Birc5         | 8.51E-04 | -4.30  | 3.37E-03 | -3.64  | 2.34E-03 | -5.07  | Y | 1 | 1 | baculoviral IAP repeat-containing 5                                         |
| Tpx2          | 3.50E-04 | -4.30  | 7.67E-03 | -2.81  | 2.89E-04 | -6.58  | Y | 1 | 1 | TPX2, microtubule-associated protein homolog ( <i>Xenopus laevis</i> ) /    |
| Kif18b        | 2.71E-04 | -4.36  | 2.81E-03 | -3.24  | 4.34E-04 | -5.87  | Y | 1 | 1 | kinesin family member 18B                                                   |
| Mt2           | 1.73E-09 | -4.37  | 1.21E-06 | -2.58  | 6.42E-10 | -7.40  | Y | 1 | 1 | metallothionein 2                                                           |
| Cd1d1         | 7.46E-14 | -4.40  | 1.62E-11 | -2.95  | 7.11E-14 | -6.56  | Y | 1 | 1 | CD1d1 antigen                                                               |
| 1700025G04Rik | 1.27E-04 | -4.44  | 1.60E-04 | -4.67  | 1.39E-03 | -4.23  | Y | 1 | 1 | RIKEN cDNA 1700025G04 gene                                                  |
| Trim16        | 2.15E-06 | -4.45  | 3.54E-05 | -3.43  | 5.20E-06 | -5.77  | Y | 1 | 1 | tripartite motif-containing 16                                              |
| Nrm           | 6.24E-06 | -4.46  | 1.62E-05 | -4.28  | 6.06E-05 | -4.64  | Y | 1 | 1 | nurim (nuclear envelope membrane protein)                                   |
| Depdc1a       | 9.40E-04 | -4.46  | 6.43E-03 | -3.39  | 1.60E-03 | -5.87  | Y | 1 | 1 | DEP domain containing 1a                                                    |
| Spag5         | 2.93E-04 | -4.49  | 5.54E-03 | -3.00  | 2.84E-04 | -6.72  | Y | 1 | 1 | sperm associated antigen 5                                                  |
| Airn          | 6.43E-04 | -4.51  | 4.32E-04 | -5.31  | 8.47E-03 | -3.84  | Y | 1 | 1 | antisense <i>lgf2r</i> RNA                                                  |
| Cdca3         | 1.58E-04 | -4.52  | 1.85E-03 | -3.33  | 2.56E-04 | -6.13  | Y | 1 | 1 | cell division cycle associated 3                                            |
| Kif14         | 7.44E-04 | -4.53  | 5.37E-03 | -3.43  | 1.28E-03 | -5.98  | Y | 1 | 1 | kinesin family member 14                                                    |
| Creb5         | 1.87E-14 | -4.62  | 3.61E-13 | -3.76  | 9.21E-14 | -5.68  | Y | 1 | 1 | cAMP responsive element binding protein 5                                   |
| Tmem195       | 6.18E-04 | -4.72  | 1.99E-03 | -4.15  | 2.18E-03 | -5.37  | Y | 1 | 1 | transmembrane protein 195                                                   |
| Cstb          | 9.36E-04 | -4.78  | 8.25E-04 | -5.37  | 8.89E-03 | -4.25  | Y | 1 | 1 | cystatin B                                                                  |
| Stmn1         | 1.92E-04 | -4.78  | 5.85E-04 | -4.33  | 9.08E-04 | -5.28  | Y | 1 | 1 | stathmin 1                                                                  |
| Mastl         | 4.68E-04 | -4.81  | 6.85E-03 | -3.22  | 5.02E-04 | -7.17  | Y | 1 | 1 | microtubule associated serine/threonine kinase-like                         |
| Stmn1         | 2.06E-04 | -4.81  | 6.41E-04 | -4.34  | 9.47E-04 | -5.34  | Y | 1 | 1 | stathmin 1                                                                  |
| Prr11         | 1.83E-04 | -4.93  | 4.56E-03 | -3.13  | 1.57E-04 | -7.77  | Y | 1 | 1 | proline rich 11                                                             |
| Aldh1a1       | 3.28E-05 | -4.95  | 1.44E-03 | -3.09  | 2.58E-05 | -7.92  | Y | 1 | 1 | aldehyde dehydrogenase family 1, subfamily A1                               |
| Chpt1         | 6.19E-10 | -4.99  | 6.65E-09 | -4.18  | 3.81E-09 | -5.94  | Y | 1 | 1 | choline phosphotransferase 1                                                |
| Kif2c         | 4.09E-04 | -5.02  | 2.79E-03 | -3.85  | 8.47E-04 | -6.53  | Y | 1 | 1 | kinesin family member 2C                                                    |
| Neil3         | 2.34E-04 | -5.20  | 2.37E-03 | -3.77  | 3.96E-04 | -7.18  | Y | 1 | 1 | nei like 3 ( <i>E. coli</i> )                                               |
| Sgol1         | 7.33E-04 | -5.23  | 9.50E-03 | -3.42  | 7.79E-04 | -7.98  | Y | 1 | 1 | shugoshin-like 1 ( <i>S. pombe</i> )                                        |
| Kif11         | 3.99E-04 | -5.23  | 3.21E-03 | -3.87  | 7.26E-04 | -7.07  | Y | 1 | 1 | kinesin family member 11                                                    |
| Gas2l3        | 1.31E-04 | -5.24  | 2.17E-03 | -3.56  | 1.68E-04 | -7.71  | Y | 1 | 1 | growth arrest-specific 2 like 3                                             |
| Cenpf         | 2.47E-04 | -5.24  | 1.51E-03 | -4.15  | 6.23E-04 | -6.63  | Y | 1 | 1 | centromere protein F                                                        |
| Smpd13b       | 1.02E-11 | -5.27  | 2.74E-12 | -6.86  | 3.26E-09 | -4.04  | Y | 1 | 1 | sphingomyelin phosphodiesterase, acid-like 3B                               |
| Kif4          | 2.58E-04 | -5.27  | 2.30E-03 | -3.89  | 4.73E-04 | -7.16  | Y | 1 | 1 | kinesin family member 4                                                     |
| Kif23         | 1.81E-04 | -5.30  | 1.90E-03 | -3.84  | 3.12E-04 | -7.31  | Y | 1 | 1 | kinesin family member 23                                                    |
| Kif20a        | 4.72E-04 | -5.40  | 5.67E-03 | -3.65  | 5.95E-04 | -7.99  | Y | 1 | 1 | kinesin family member 20A                                                   |
| Cep55         | 1.19E-04 | -5.43  | 1.64E-03 | -3.79  | 1.80E-04 | -7.77  | Y | 1 | 1 | centrosomal protein 55                                                      |
| Esco2         | 8.76E-04 | -5.47  | 3.91E-03 | -4.39  | 2.17E-03 | -6.81  | Y | 1 | 1 | establishment of cohesion 1 homolog 2 ( <i>S. cerevisiae</i> )              |
| 2810417H13Rik | 8.21E-04 | -5.48  | 5.79E-03 | -4.01  | 1.41E-03 | -7.51  | Y | 1 | 1 | RIKEN cDNA 2810417H13 gene                                                  |
| Nek2          | 1.40E-04 | -5.51  | 1.89E-03 | -3.82  | 2.08E-04 | -7.95  | Y | 1 | 1 | NIMA (never in mitosis gene a)-related expressed kinase 2                   |
| Nap1l3        | 2.21E-13 | -5.60  | 2.19E-11 | -3.78  | 3.38E-13 | -8.31  | Y | 1 | 1 | nucleosome assembly protein 1-like 3                                        |
| Atp2b4        | 6.42E-07 | -5.62  | 2.80E-07 | -7.04  | 4.78E-05 | -4.49  | Y | 1 | 1 | ATPase, Ca <sup>++</sup> transporting, plasma membrane 4                    |
| Ccnb2         | 1.69E-04 | -5.83  | 1.96E-03 | -4.08  | 2.73E-04 | -8.33  | Y | 1 | 1 | cyclin B2                                                                   |
| Aspm          | 5.49E-05 | -5.85  | 2.84E-04 | -4.87  | 2.11E-04 | -7.04  | Y | 1 | 1 | asp (abnormal spindle)-like, microcephaly associated ( <i>Drosophila</i> )  |
| Lrmp          | 1.86E-08 | -5.89  | 5.17E-08 | -5.68  | 3.05E-07 | -6.10  | Y | 1 | 1 | lymphoid-restricted membrane protein                                        |
| Hist1h2ab     | 1.24E-03 | -6.00  | 8.87E-03 | -4.20  | 1.90E-03 | -8.55  | Y | 1 | 1 | histone cluster 1, H2ab                                                     |
| Nusap1        | 1.60E-04 | -6.06  | 1.21E-03 | -4.56  | 3.70E-04 | -8.04  | Y | 1 | 1 | nucleolar and spindle associated protein 1                                  |
| Clec2i        | 1.26E-08 | -6.11  | 1.02E-10 | -15.05 | 5.23E-04 | -2.48  | Y | 1 | 1 | C-type lectin domain family 2, member i                                     |
| Pdlim1        | 8.38E-06 | -6.15  | 1.48E-04 | -4.33  | 1.61E-05 | -8.74  | Y | 1 | 1 | PDZ and LIM domain 1 (elfin)                                                |
| Gm8736        | 6.83E-13 | -6.41  | 1.05E-07 | -2.31  | 3.47E-14 | -17.80 | Y | 1 | 1 | predicted gene 8736                                                         |
| Gm8800        | 7.44E-13 | -6.60  | 8.08E-08 | -2.39  | 4.24E-14 | -18.24 | Y | 1 | 1 | predicted gene 8800                                                         |
| Fam38a        | 5.69E-08 | -6.90  | 3.51E-08 | -8.34  | 3.87E-06 | -5.71  | Y | 1 | 1 | family with sequence similarity 38, member A                                |
| Inpp5d        | 1.41E-08 | -6.91  | 8.30E-08 | -5.98  | 1.21E-07 | -7.98  | Y | 1 | 1 | inositol polyphosphate-5-phosphatase D                                      |
| Bub1          | 3.95E-04 | -7.01  | 8.59E-03 | -3.95  | 3.20E-04 | -12.45 | Y | 1 | 1 | budding uninhibited by benzimidazoles 1 homolog ( <i>S. cerevisiae</i> )    |
| Nuf2          | 3.01E-04 | -7.05  | 4.22E-03 | -4.44  | 3.70E-04 | -11.20 | Y | 1 | 1 | NUF2, NDC80 kinetochore complex component, homolog ( <i>S. cerevisiae</i> ) |
| Hmnr          | 1.01E-04 | -7.48  | 7.48E-04 | -5.56  | 2.59E-04 | -10.07 | Y | 1 | 1 | hyaluronan mediated motility receptor (RHAMM)                               |
| Ccna2         | 2.69E-04 | -7.63  | 2.19E-03 | -5.35  | 5.26E-04 | -10.88 | Y | 1 | 1 | cyclin A2                                                                   |
| Pdlim1        | 2.26E-05 | -7.70  | 3.24E-04 | -5.24  | 4.42E-05 | -11.29 | Y | 1 | 1 | PDZ and LIM domain 1 (elfin)                                                |
| Cpa6          | 5.06E-15 | -7.72  | 3.25E-14 | -6.74  | 6.23E-14 | -8.86  | Y | 1 | 1 | carboxypeptidase A6                                                         |
| D17H6556E-5   | 8.54E-06 | -7.74  | 2.29E-04 | -4.86  | 1.20E-05 | -12.33 | Y | 1 | 1 | DNA segment, Chr 17, human D6S56E 5                                         |
| Gem           | 2.27E-05 | -7.98  | 1.17E-04 | -6.54  | 1.01E-04 | -9.74  | Y | 1 | 1 | GTP binding protein (gene overexpressed in skeletal muscle)                 |
| Ernm          | 6.73E-10 | -8.12  | 3.39E-07 | -4.02  | 3.15E-10 | -16.40 | Y | 1 | 1 | ermin, ERM-like protein                                                     |
| Rgs18         | 3.06E-04 | -8.14  | 3.53E-03 | -5.17  | 4.37E-04 | -12.79 | Y | 1 | 1 | regulator of G-protein signaling 18                                         |
| Peci          | 1.42E-05 | -9.11  | 2.45E-05 | -9.24  | 1.74E-04 | -8.98  | Y | 1 | 1 | peroxisomal delta3, delta2-enoyl-Coenzyme A isomerase                       |
| S1pr1         | 1.87E-13 | -9.98  | 1.29E-14 | -18.55 | 5.04E-10 | -5.36  | Y | 1 | 1 | sphingosine-1-phosphate receptor 1                                          |
| Gpr128        | 1.59E-14 | -11.47 | 5.76E-06 | -1.85  | 1.31E-16 | -71.24 | Y | 1 | 1 | G protein-coupled receptor 128                                              |
| Tmem159       | 2.49E-12 | -12.48 | 9.50E-13 | -17.36 | 5.30E-10 | -8.96  | Y | 1 | 1 | transmembrane protein 159                                                   |
| A930038C07Rik | 3.48E-10 | -14.70 | 2.40E-10 | -18.56 | 3.01E-08 | -11.65 | Y | 1 | 1 | RIKEN cDNA A930038C07 gene                                                  |
| Atp2a3        | 2.53E-10 | -14.95 | 5.69E-09 | -9.84  | 9.07E-10 | -22.71 | Y | 1 | 1 | ATPase, Ca <sup>++</sup> transporting, ubiquitous                           |
| Sccpdh        | 1.51E-06 | -15.03 | 1.65E-05 | -10.31 | 5.23E-06 | -21.91 | Y | 1 | 1 | saccharopine dehydrogenase (putative)                                       |
| Wls           | 1.85E-07 | -15.38 | 7.90E-07 | -13.15 | 1.72E-06 | -17.97 | Y | 1 | 1 | wntless homolog ( <i>Drosophila</i> )                                       |
| Slc27a6       | 6.19E-14 | -16.05 | 1.64E-12 | -10.46 | 2.37E-13 | -24.62 | Y | 1 | 1 | solute carrier family 27 (fatty acid transporter), member 6                 |
| Phyh          | 2.60E-15 | -17.08 | 1.38E-14 | -14.62 | 3.80E-14 | -19.96 | Y | 1 | 1 | phytanoyl-CoA hydroxylase                                                   |
| Mr1           | 2.37E-13 | -17.81 | 7.15E-13 | -16.87 | 5.51E-12 | -18.80 | Y | 1 | 1 | major histocompatibility complex, class I-related                           |
| Hadh          | 1.45E-11 | -18.48 | 2.01E-09 | -8.82  | 1.65E-11 | -38.75 | Y | 1 | 1 | hydroxyacyl-Coenzyme A dehydrogenase                                        |
| Lxn           | 9.05E-08 | -24.69 | 4.33E-07 | -20.13 | 8.14E-07 | -30.29 | Y | 1 | 1 | latexin                                                                     |

|       |          |        |          |        |          |        |   |   |   |                                          |
|-------|----------|--------|----------|--------|----------|--------|---|---|---|------------------------------------------|
| Macc1 | 1.28E-14 | -25.02 | 3.37E-13 | -15.30 | 5.05E-14 | -40.90 | Y | 1 | 1 | metastasis associated in colon cancer 1  |
| Rny1  | 9.90E-10 | -28.06 | 6.78E-09 | -21.51 | 8.69E-09 | -36.62 | Y | 1 | 1 | RNA, Y1 small cytoplasmic, Ro-associated |
| Aldoc | 1.48E-08 | -41.38 | 6.85E-07 | -18.72 | 2.58E-08 | -91.49 | Y | 1 | 1 | aldolase C, fructose-bisphosphate        |

|         |               | CD81L13+ vs CD81L13-                            |                                             |                                                     | CD81L13+ vs CD81L13- & alloCD8                  |                                             |                                                     | CD81L13+ vs alloCD8                             |                                             |                                                     |          |          |          |           |                                                                   |                                               |  |
|---------|---------------|-------------------------------------------------|---------------------------------------------|-----------------------------------------------------|-------------------------------------------------|---------------------------------------------|-----------------------------------------------------|-------------------------------------------------|---------------------------------------------|-----------------------------------------------------|----------|----------|----------|-----------|-------------------------------------------------------------------|-----------------------------------------------|--|
|         |               | p-value (sAg1 and sAg3 vs. Suvmo-2 and Suvmo-3) | FDR (sAg1 and sAg3 vs. Suvmo-2 and Suvmo-3) | Fold-Change (sAg1 and sAg3 vs. Suvmo-2 and Suvmo-3) | p-value (sAg1 and sAg3 vs. Suvmo-2 and Suvmo-3) | FDR (sAg1 and sAg3 vs. Suvmo-2 and Suvmo-3) | Fold-Change (sAg1 and sAg3 vs. Suvmo-2 and Suvmo-3) | p-value (sAg1 and sAg3 vs. Suvmo-2 and Suvmo-3) | FDR (sAg1 and sAg3 vs. Suvmo-2 and Suvmo-3) | Fold-Change (sAg1 and sAg3 vs. Suvmo-2 and Suvmo-3) | all      | any      | all      | same      | gene description                                                  |                                               |  |
| Table 1 | Gene          | Suvmo-2 and Suvmo-3                             | Suvmo-2 and Suvmo-3                         | Suvmo-2 and Suvmo-3                                 | Suvmo-2 and Suvmo-3                             | Suvmo-2 and Suvmo-3                         | Suvmo-2 and Suvmo-3                                 | Suvmo-2 and Suvmo-3                             | Suvmo-2 and Suvmo-3                         | Suvmo-2 and Suvmo-3                                 | p < 0.01 | fold > 3 | fold > 3 | direction | gene description                                                  |                                               |  |
|         | Amelx         | 8.37E-21                                        | 3.61E-17                                    | 46.63                                               | 2.23E-21                                        | 1.93E-17                                    | 46.16                                               | 1.95E-19                                        | 3.31E-16                                    | 45.23                                               | 1        | 1        | 1        | Y         | amelogenin X chromosome                                           |                                               |  |
|         | IL5           | 2.20E-15                                        | 6.32E-13                                    | 32.10                                               | 4.07E-16                                        | 1.97E-13                                    | 34.78                                               | 1.64E-14                                        | 2.48E-12                                    | 40.81                                               | 1        | 1        | 1        | Y         | interleukin 5                                                     |                                               |  |
|         | Tm4sf19       | 1.32E-13                                        | 1.71E-11                                    | 30.03                                               | 2.74E-14                                        | 5.40E-12                                    | 31.69                                               | 1.30E-12                                        | 7.97E-11                                    | 35.28                                               | 1        | 1        | 1        | Y         | transmembrane 4 L six family member 19                            |                                               |  |
|         | IL13          | 2.96E-17                                        | 2.55E-14                                    | 25.57                                               | 4.13E-17                                        | 3.30E-14                                    | 18.06                                               | 1.85E-13                                        | 1.76E-11                                    | 9.01                                                | 1        | 1        | 1        | Y         | interleukin 13                                                    |                                               |  |
|         | Gabra1        | 3.00E-12                                        | 2.11E-10                                    | 15.71                                               | 4.01E-13                                        | 4.54E-11                                    | 17.95                                               | 7.98E-12                                        | 3.42E-10                                    | 23.41                                               | 1        | 1        | 1        | Y         | gamma-aminobutyric acid (GABA) A receptor, subunit alpha 1        |                                               |  |
|         | 1830127L07Rik | 4.49E-17                                        | 3.52E-14                                    | 14.21                                               | 1.09E-17                                        | 1.26E-14                                    | 14.35                                               | 7.74E-16                                        | 1.97E-13                                    | 14.64                                               | 1        | 1        | 1        | Y         | RIKEN cDNA 1830127L07 gene                                        |                                               |  |
|         | Clgn          | 4.32E-12                                        | 2.85E-10                                    | 6.55                                                | 2.96E-14                                        | 5.64E-12                                    | 11.16                                               | 1.02E-14                                        | 1.62E-12                                    | 32.42                                               | 1        | 1        | 1        | Y         | calmegin                                                          |                                               |  |
|         | Mest          | 1.92E-13                                        | 2.36E-11                                    | 5.70                                                | 4.49E-16                                        | 1.97E-13                                    | 10.97                                               | 5.42E-17                                        | 2.44E-14                                    | 40.66                                               | 1        | 1        | 1        | Y         | mesoderm specific transcript                                      |                                               |  |
|         | Ccr8          | 6.91E-21                                        | 3.61E-17                                    | 10.98                                               | 2.05E-21                                        | 1.93E-17                                    | 10.72                                               | 2.26E-19                                        | 3.31E-16                                    | 10.22                                               | 1        | 1        | 1        | Y         | chemokine (C-C motif) receptor 8                                  |                                               |  |
|         | Pri2c5        | 4.73E-15                                        | 1.12E-12                                    | 9.75                                                | 1.77E-15                                        | 5.90E-13                                    | 9.23                                                | 2.86E-13                                        | 2.41E-11                                    | 8.25                                                | 1        | 1        | 1        | Y         | prolactin family 2, subfamily c, member 5                         |                                               |  |
|         | CtsG          | 6.01E-11                                        | 2.42E-09                                    | 7.83                                                | 1.27E-11                                        | 7.46E-10                                    | 8.11                                                | 5.16E-10                                        | 1.09E-08                                    | 8.71                                                | 1        | 1        | 1        | Y         | cathepsin G                                                       |                                               |  |
|         | Tubb6         | 2.45E-15                                        | 6.71E-13                                    | 7.44                                                | 7.28E-16                                        | 2.93E-13                                    | 7.30                                                | 7.39E-14                                        | 8.50E-12                                    | 7.03                                                | 1        | 1        | 1        | Y         | tubulin, beta 6                                                   |                                               |  |
|         | Gm9766        | 6.12E-15                                        | 1.38E-12                                    | 3.95                                                | 6.63E-18                                        | 8.43E-15                                    | 7.28                                                | 4.11E-19                                        | 4.98E-16                                    | 24.75                                               | 1        | 1        | 1        | Y         | predicted gene 9766                                               |                                               |  |
|         | Penk          | 5.05E-12                                        | 3.29E-10                                    | 5.19                                                | 3.20E-13                                        | 3.70E-11                                    | 6.15                                                | 1.90E-12                                        | 1.06E-10                                    | 8.65                                                | 1        | 1        | 0        | Y         | preproenkephalin                                                  |                                               |  |
|         | B4galnt2      | 1.80E-11                                        | 9.18E-10                                    | 8.90                                                | 1.76E-10                                        | 6.63E-09                                    | 5.47                                                | 2.26E-04                                        | 7.37E-04                                    | 2.07                                                | 1        | 1        | 0        | Y         | beta-1,4-N-acetyl-galactosaminyl transferase 2                    |                                               |  |
|         | Epdrl         | 1.50E-07                                        | 1.61E-06                                    | 1.83                                                | 2.13E-14                                        | 4.56E-12                                    | 5.45                                                | 7.91E-18                                        | 5.93E-15                                    | 48.11                                               | 1        | 1        | 0        | Y         | ependymin related protein 1 (zebrafish)                           |                                               |  |
|         | Hcn1          | 1.24E-14                                        | 2.55E-12                                    | 5.46                                                | 3.72E-15                                        | 1.06E-12                                    | 5.37                                                | 3.73E-13                                        | 2.94E-11                                    | 5.20                                                | 1        | 1        | 1        | Y         | hyperpolarization-activated, cyclic nucleotide-gated K+ 1         |                                               |  |
|         | Edil3         | 9.65E-18                                        | 1.04E-14                                    | 5.16                                                | 3.01E-18                                        | 5.22E-15                                    | 5.05                                                | 3.54E-16                                        | 1.07E-13                                    | 4.84                                                | 1        | 1        | 1        | 0         | Y                                                                 | EGF-like repeats and discoidin-like domains 3 |  |
|         | Arntl         | 1.03E-16                                        | 6.58E-14                                    | 6.51                                                | 3.05E-16                                        | 1.71E-13                                    | 4.90                                                | 1.50E-11                                        | 5.71E-10                                    | 2.78                                                | 1        | 1        | 1        | Y         | aryl hydrocarbon receptor nuclear translocator-like               |                                               |  |
|         | Ctla2a        | 2.19E-17                                        | 2.10E-14                                    | 5.68                                                | 2.54E-17                                        | 2.20E-14                                    | 4.81                                                | 6.76E-14                                        | 8.04E-12                                    | 3.44                                                | 1        | 1        | 1        | Y         | cytotoxic T lymphocyte-associated protein 2 alpha                 |                                               |  |
|         | Offm3         | 3.07E-13                                        | 3.42E-11                                    | 8.76                                                | 9.78E-12                                        | 6.32E-10                                    | 4.76                                                | 8.52E-03                                        | 1.66E-02                                    | 1.41                                                | 1        | 1        | 0        | Y         | olfactomedin 3                                                    |                                               |  |
|         | Cd4           | 8.2E-14                                         | 1.27E-11                                    | 4.79                                                | 2.59E-14                                        | 5.24E-12                                    | 4.73                                                | 2.41E-12                                        | 1.09E-10                                    | 4.62                                                | 1        | 1        | 1        | Y         | CD4 antigen                                                       |                                               |  |
|         | Gja5          | 2.34E-14                                        | 4.25E-12                                    | 4.09                                                | 1.46E-15                                        | 4.96E-13                                    | 4.72                                                | 9.28E-15                                        | 1.54E-12                                    | 6.28                                                | 1        | 1        | 1        | Y         | gap junction protein, alpha 5                                     |                                               |  |
|         | Ctss          | 3.23E-09                                        | 6.27E-08                                    | 3.57                                                | 5.75E-11                                        | 2.60E-09                                    | 4.70                                                | 4.89E-11                                        | 1.51E-09                                    | 8.17                                                | 1        | 1        | 1        | Y         | cathepsin S                                                       |                                               |  |
|         | Dusp4         | 6.55E-09                                        | 1.13E-07                                    | 4.16                                                | 6.57E-10                                        | 1.94E-08                                    | 4.66                                                | 5.80E-09                                        | 8.35E-08                                    | 5.83                                                | 1        | 1        | 1        | Y         | dual specificity phosphatase 4                                    |                                               |  |
|         | Mcc           | 7.44E-14                                        | 1.10E-11                                    | 4.78                                                | 2.91E-14                                        | 5.60E-12                                    | 4.58                                                | 4.92E-12                                        | 2.24E-10                                    | 4.21                                                | 1        | 1        | 1        | Y         | mutated in colorectal cancers                                     |                                               |  |
|         | Lyg5b         | 1.67E-18                                        | 2.45E-15                                    | 4.28                                                | 2.48E-19                                        | 6.14E-16                                    | 4.52                                                | 7.06E-18                                        | 5.56E-15                                    | 5.03                                                | 1        | 1        | 0        | Y         | lymphocyte antigen 6 complex, locus G5B                           |                                               |  |
|         | Serpinb9g     | 9.95E-12                                        | 5.74E-10                                    | 7.21                                                | 1.35E-10                                        | 5.39E-09                                    | 4.49                                                | 6.94E-04                                        | 1.94E-03                                    | 1.75                                                | 1        | 1        | 1        | Y         | serine (or cysteine) peptidase inhibitor, clade B, member 9g      |                                               |  |
|         | Tcrg-c        | 1.38E-04                                        | 5.29E-04                                    | 3.34                                                | 4.98E-06                                        | 3.24E-05                                    | 4.48                                                | 3.23E-06                                        | 1.81E-05                                    | 8.06                                                | 1        | 1        | 1        | Y         | T-cell receptor gamma, constant region                            |                                               |  |
|         | Tm4sf1        | 2.29E-16                                        | 1.23E-13                                    | 6.83                                                | 2.65E-15                                        | 8.51E-13                                    | 4.42                                                | 4.73E-08                                        | 4.89E-07                                    | 1.86                                                | 1        | 1        | 1        | Y         | transmembrane 4 superfamily member 1                              |                                               |  |
|         | IL3           | 2.01E-16                                        | 1.16E-13                                    | 4.31                                                | 4.19E-17                                        | 3.30E-14                                    | 4.40                                                | 2.17E-15                                        | 4.50E-13                                    | 4.59                                                | 1        | 1        | 1        | Y         | interleukin 3                                                     |                                               |  |
|         | Pecam1        | 8.23E-10                                        | 1.97E-08                                    | 3.33                                                | 1.50E-11                                        | 8.44E-10                                    | 4.30                                                | 1.38E-11                                        | 5.30E-10                                    | 7.15                                                | 1        | 1        | 1        | Y         | platelet/endothelial cell adhesion molecule 1                     |                                               |  |
|         | Spats2        | 2.08E-04                                        | 7.59E-04                                    | 1.70                                                | 2.99E-10                                        | 1.02E-08                                    | 4.28                                                | 1.55E-13                                        | 1.56E-11                                    | 27.10                                               | 1        | 1        | 0        | Y         | spermatogenesis associated, serine-rich 2                         |                                               |  |
|         | 1810011H11Rik | 2.02E-05                                        | 1.01E-04                                    | 3.14                                                | 4.18E-07                                        | 3.97E-06                                    | 4.28                                                | 1.98E-07                                        | 1.65E-06                                    | 7.91                                                | 1        | 1        | 1        | Y         | RIKEN cDNA 1810011H11 gene                                        |                                               |  |
|         | Fam169b       | 2.07E-13                                        | 2.51E-11                                    | 3.02                                                | 9.84E-16                                        | 3.79E-13                                    | 4.27                                                | 2.39E-16                                        | 8.79E-14                                    | 8.51                                                | 1        | 1        | 1        | Y         | family with sequence similarity 169, member B                     |                                               |  |
|         | Lepr          | 7.04E-15                                        | 1.56E-12                                    | 4.81                                                | 7.49E-15                                        | 1.85E-12                                    | 4.17                                                | 1.43E-11                                        | 5.47E-10                                    | 3.13                                                | 1        | 1        | 1        | Y         | leptin receptor                                                   |                                               |  |
|         | Gmfg          | 1.73E-12                                        | 1.37E-10                                    | 3.27                                                | 4.03E-14                                        | 6.85E-12                                    | 4.05                                                | 6.02E-14                                        | 7.35E-12                                    | 6.21                                                | 1        | 1        | 0        | Y         | glia maturation factor, gamma                                     |                                               |  |
|         | Cd2ap         | 1.91E-12                                        | 1.50E-10                                    | 5.40                                                | 7.73E-12                                        | 5.34E-10                                    | 4.05                                                | 6.11E-07                                        | 4.33E-06                                    | 2.27                                                | 1        | 1        | 1        | Y         | CD2-associated protein                                            |                                               |  |
|         | Tnfrsf4       | 1.41E-14                                        | 2.77E-12                                    | 4.26                                                | 8.09E-15                                        | 1.97E-12                                    | 3.95                                                | 3.29E-12                                        | 1.65E-10                                    | 3.40                                                | 1        | 1        | 1        | Y         | tumor necrosis factor (ligand) superfamily, member 4              |                                               |  |
|         | Serpinb9f     | 4.47E-08                                        | 5.80E-07                                    | 1.50                                                | 3.22E-16                                        | 1.74E-13                                    | 3.95                                                | 5.23E-20                                        | 1.55E-16                                    | 27.30                                               | 1        | 1        | 1        | Y         | serine (or cysteine) peptidase inhibitor, clade B, member 9f      |                                               |  |
|         | Areg          | 2.03E-10                                        | 6.46E-09                                    | 3.27                                                | 9.16E-12                                        | 6.08E-10                                    | 3.84                                                | 2.95E-11                                        | 1.00E-09                                    | 5.28                                                | 1        | 1        | 1        | Y         | amphiregulin                                                      |                                               |  |
|         | Ebi3          | 9.09E-08                                        | 1.04E-06                                    | 3.01                                                | 2.32E-09                                        | 5.41E-08                                    | 3.76                                                | 2.53E-09                                        | 4.14E-08                                    | 5.84                                                | 1        | 1        | 1        | Y         | Epstein-Barr virus induced gene 3                                 |                                               |  |
|         | Klf3a         | 2.52E-04                                        | 8.99E-04                                    | 2.75                                                | 7.33E-06                                        | 4.52E-05                                    | 3.65                                                | 3.25E-06                                        | 1.82E-05                                    | 6.45                                                | 1        | 1        | 0        | Y         | kinesin family member 3A                                          |                                               |  |
|         | Serpinb9g     | 1.64E-12                                        | 1.33E-10                                    | 4.04                                                | 1.32E-12                                        | 1.18E-10                                    | 3.64                                                | 1.04E-09                                        | 1.94E-08                                    | 2.97                                                | 1        | 1        | 0        | Y         | serine (or cysteine) peptidase inhibitor, clade B, member 9g      |                                               |  |
|         | Farp1         | 6.81E-10                                        | 1.68E-08                                    | 3.09                                                | 2.90E-11                                        | 1.47E-09                                    | 3.63                                                | 8.24E-11                                        | 2.32E-09                                    | 4.98                                                | 1        | 1        | 1        | Y         | FERM, RhoGEF (Arhgef) and pleckstrin domain protein 1 (chondrocyt |                                               |  |
|         | Rtn1          | 6.57E-17                                        | 4.53E-14                                    | 5.20                                                | 8.87E-16                                        | 3.49E-13                                    | 3.54                                                | 4.18E-08                                        | 4.41E-07                                    | 1.64                                                | 1        | 1        | 0        | Y         | reticulin 1                                                       |                                               |  |
|         | Tnfrsf11      | 7.68E-04                                        | 2.36E-03                                    | 2.78                                                | 4.84E-05                                        | 2.23E-04                                    | 3.49                                                | 4.10E-05                                        | 1.66E-04                                    | 5.50                                                | 1        | 1        | 0        | Y         | tumor necrosis factor (ligand) superfamily, member 11             |                                               |  |
|         | Kynu          | 1.98E-14                                        | 3.63E-12                                    | 4.89                                                | 1.94E-13                                        | 2.45E-11                                    | 3.46                                                | 9.26E-07                                        | 6.19E-06                                    | 1.73                                                | 1        | 1        | 0        | Y         | kynureninase (L-kynurenine hydrolase)                             |                                               |  |
|         | Akr1c12       | 3.83E-11                                        | 1.72E-09                                    | 2.69                                                | 4.08E-13                                        | 4.57E-11                                    | 3.45                                                | 2.20E-13                                        | 2.01E-11                                    | 5.65                                                | 1        | 1        | 1        | Y         | aldo-keto reductase family 1, member C12                          |                                               |  |
|         | Serpinb9e     | 7.85E-15                                        | 1.69E-12                                    | 3.58                                                | 3.15E-15                                        | 9.58E-13                                    | 3.45                                                | 5.85E-13                                        | 4.15E-11                                    | 3.20                                                | 1        | 1        | 1        | Y         | serine (or cysteine) peptidase inhibitor, clade B, member 9e      |                                               |  |
|         | Cyp11a1       | 2.48E-13                                        | 2.89E-11                                    | 3.03                                                | 1.39E-14                                        | 3.17E-12                                    | 3.42                                                | 7.29E-14                                        | 8.50E-12                                    | 4.37                                                | 1        | 1        | 1        | Y         | cytochrome P450, family 11, subfamily A, polypeptide 1            |                                               |  |
|         | Pam           | 3.43E-11                                        | 1.56E-09                                    | 3.02                                                | 2.15E-12                                        | 1.80E-10                                    | 3.40                                                | 1.19E-11                                        | 4.70E-10                                    | 4.30                                                | 1        | 1        | 1        | Y         | peptidylglycine alpha-amidating monooxygenase                     |                                               |  |
|         | Cdkn2a        | 4.44E-13                                        | 4.56E-11                                    | 4.82                                                | 5.04E-12                                        | 3.70E-10                                    | 3.37                                                | 2.81E-05                                        | 1.19E-04                                    | 1.65                                                | 1        | 1        | 0        | Y         | cyclin-dependent kinase inhibitor 2A                              |                                               |  |
|         | Atmn          | 2.59E-03                                        | 6.74E-03                                    | 2.39                                                | 6.51E-05                                        | 2.87E-04                                    | 3.35                                                | 1.34E-05                                        | 6.23E-05                                    | 6.54                                                | 1        | 1        | 0        | Y         | amelotin                                                          |                                               |  |
|         | Ptpre         | 3.98E-13                                        | 4.16E-11                                    | 3.57                                                | 2.25E-13                                        | 2.68E-11                                    | 3.34                                                | 8.05E-11                                        | 2.28E-09                                    | 2.94                                                | 1        | 1        | 0        | Y         | protein tyrosine phosphatase, receptor type, E                    |                                               |  |
|         | Gpr97         | 1.59E-11                                        | 8.26E-10                                    | 3.33                                                | 4.11E-12                                        | 3.14E-10                                    | 3.34                                                | 2.56E-10                                        | 6.04E-09                                    | 3.36                                                | 1        | 1        | 0        | Y         | G protein-coupled receptor 97                                     |                                               |  |
|         | Igf2bp2       | 1.01E-07                                        | 1.14E-06                                    | 2.26                                                | 2.57E-10                                        | 9.05E-09                                    | 3.17                                                | 2.34E-11                                        | 8.23E-10                                    | 6.25                                                | 1        | 1        | 0        | Y         | insulin-like growth factor 2 mRNA binding protein 2               |                                               |  |
|         | Rcsd1         | 1.73E-14                                        | 3.28E-12                                    | 3.13                                                | 3.87E-15                                        | 1.08E-12                                    | 3.16                                                | 2.18E-13                                        | 2.01E-11                                    | 3.24                                                | 1        | 1        | 1        | Y         | RCS domain containing 1                                           |                                               |  |
|         | Syt11         | 3.55E-11                                        | 1.60E-09                                    | 2.08                                                | 1.32E-14                                        | 3.09E-12                                    | 3.15                                                | 3.16E-16                                        | 1.04E-13                                    | 7.24                                                | 1        | 1        | 0        | Y         | synaptotagmin XI                                                  |                                               |  |
|         | Pyhin1        | 1.77E-18                                        | 2.45E-15                                    | 4.98                                                | 7.04E-17                                        | 5.08E-14                                    | 3.14                                                | 2.40E-05                                        | 1.03E-04                                    | 1.25                                                | 1        | 1        | 0        | Y         | pyrin and HIN domain family, member 1                             |                                               |  |
|         | Klk1b11       | 1.93E-13                                        | 2.36E-11                                    | 3.03                                                | 3.26E-14                                        | 6.04E-12                                    | 3.13                                                | 1.04E-12                                        | 6.63E-11                                    | 3.35                                                | 1        | 1        | 0        | Y         | potassium channel, subfamily K, member 10                         |                                               |  |
|         | Rnf213        | 6.17E-15                                        | 1.38E-12                                    | 3.95                                                | 2.48E-14                                        | 5.12E-12                                    | 3.13                                                | 3.10E-09                                        | 4.92E-08                                    | 1.96                                                | 1        | 1        | 0        | Y         | ring finger protein 213                                           |                                               |  |
|         | Hif1o         | 7.41E-08                                        | 8.83E-07                                    | 1.72                                                | 7.15E-13                                        | 7.18E-11                                    | 3.08                                                | 1.50E-15                                        | 3.38E-13                                    | 9.95                                                | 1        | 1        | 0        | Y         | H1 histone family, member 0                                       |                                               |  |
|         | Hpcal1        | 2.21E-03                                        | 5.89E-03                                    | 1.53                                                | 2.49E-08                                        | 3.72E-07                                    | 3.03                                                | 2.08E-11                                        | 7.41E-10                                    | 11.89                                               | 1        | 1        | 0</      |           |                                                                   |                                               |  |

|               |          |          |       |          |          |       |          |          |        |   |   |   |   |                                                                   |
|---------------|----------|----------|-------|----------|----------|-------|----------|----------|--------|---|---|---|---|-------------------------------------------------------------------|
| BC094916      | 3.12E-05 | 1.46E-04 | 2.10  | 1.21E-06 | 9.81E-06 | 2.45  | 1.14E-06 | 7.41E-06 | 3.35   | 1 | 1 | 0 | Y | cDNA sequence BC094916                                            |
| Gng12         | 7.72E-10 | 1.87E-08 | 1.97  | 4.31E-12 | 3.26E-10 | 2.44  | 1.05E-12 | 6.67E-11 | 3.75   | 1 | 1 | 0 | Y | guanine nucleotide binding protein (G protein), gamma 12          |
| 4930486L24Rik | 2.20E-12 | 1.68E-10 | 3.01  | 1.21E-11 | 7.16E-10 | 2.44  | 2.75E-06 | 1.57E-05 | 1.61   | 1 | 1 | 0 | Y | RIKEN cDNA 4930486L24 gene                                        |
| Dip2c         | 3.29E-09 | 6.36E-08 | 1.79  | 2.39E-12 | 1.98E-10 | 2.43  | 8.60E-14 | 9.74E-12 | 4.46   | 1 | 1 | 0 | Y | DIP2 disco-interacting protein 2 homolog C (Drosophila)           |
| Ncam2         | 1.59E-09 | 3.43E-08 | 1.98  | 1.14E-11 | 6.91E-10 | 2.43  | 3.54E-12 | 1.72E-10 | 3.63   | 1 | 1 | 0 | Y | neuronal cell adhesion molecule 2                                 |
| St3gal6       | 6.20E-08 | 7.62E-07 | 1.61  | 3.17E-12 | 2.53E-10 | 2.41  | 1.65E-14 | 2.48E-12 | 5.42   | 1 | 1 | 0 | Y | ST3 beta-galactoside alpha-2,3-sialyltransferase 6                |
| Prdx4         | 7.19E-06 | 4.17E-05 | 2.07  | 2.73E-07 | 2.77E-06 | 2.39  | 3.12E-07 | 2.39E-06 | 3.19   | 1 | 1 | 0 | Y | peroxiredoxin 4                                                   |
| Gbp2          | 9.50E-04 | 2.84E-03 | 1.80  | 8.52E-06 | 5.14E-05 | 2.38  | 7.93E-07 | 5.42E-06 | 4.14   | 1 | 1 | 0 | Y | guanylate binding protein 2                                       |
| Arhgap6       | 8.32E-08 | 9.72E-07 | 1.90  | 3.96E-10 | 1.29E-08 | 2.38  | 6.66E-11 | 1.95E-09 | 3.74   | 1 | 1 | 0 | Y | Rho GTPase activating protein 6                                   |
| Dip2c         | 5.70E-08 | 7.11E-07 | 1.77  | 5.65E-11 | 2.58E-09 | 2.37  | 2.33E-12 | 1.25E-10 | 4.25   | 1 | 1 | 0 | Y | DIP2 disco-interacting protein 2 homolog C (Drosophila)           |
| Fam46c        | 1.18E-03 | 3.41E-03 | 1.30  | 3.73E-10 | 1.22E-08 | 2.34  | 9.11E-14 | 1.02E-11 | 7.66   | 1 | 1 | 0 | Y | family with sequence similarity 46, member C                      |
| Hgfca         | 9.81E-08 | 1.12E-06 | 1.96  | 1.21E-09 | 3.19E-08 | 2.34  | 5.50E-10 | 1.14E-08 | 3.35   | 1 | 1 | 0 | Y | hepatocyte growth factor activator                                |
| Hbegf         | 2.10E-04 | 7.66E-04 | 1.39  | 8.40E-10 | 2.39E-08 | 2.32  | 6.55E-13 | 4.63E-11 | 6.46   | 1 | 1 | 0 | Y | heparin-binding EGF-like growth factor                            |
| Slc24a3       | 3.01E-05 | 1.42E-04 | 1.48  | 6.63E-10 | 1.95E-08 | 2.30  | 1.42E-12 | 8.54E-11 | 5.57   | 1 | 1 | 0 | Y | solute carrier family 24 (sodium/potassium/calcium exchanger),    |
| Hcst          | 2.82E-08 | 3.93E-07 | 1.80  | 6.47E-11 | 2.88E-09 | 2.29  | 5.73E-12 | 2.55E-10 | 3.74   | 1 | 1 | 0 | Y | hematopoietic cell signal transducer                              |
| Adam22        | 8.64E-08 | 1.01E-06 | 1.87  | 7.09E-10 | 2.06E-08 | 2.26  | 2.08E-10 | 5.05E-09 | 3.30   | 1 | 1 | 0 | Y | a disintegrin and metalloproteinase domain 22                     |
| Slc41a2       | 1.05E-05 | 5.76E-05 | 1.78  | 5.53E-08 | 7.29E-07 | 2.24  | 6.73E-09 | 9.47E-08 | 3.55   | 1 | 1 | 0 | Y | solute carrier family 41, member 2                                |
| 2810055G20Rik | 6.63E-03 | 1.50E-02 | 1.43  | 1.22E-06 | 9.86E-06 | 2.24  | 3.26E-09 | 5.14E-08 | 5.47   | 1 | 1 | 0 | Y | RIKEN cDNA 2810055G20 gene                                        |
| Dennd5a       | 3.81E-03 | 9.37E-03 | 1.23  | 3.88E-10 | 1.27E-08 | 2.22  | 5.62E-14 | 6.92E-12 | 7.22   | 1 | 1 | 0 | Y | DENN/MADD domain containing 5A                                    |
| Rab4a         | 8.59E-12 | 5.07E-10 | 1.85  | 5.50E-14 | 8.59E-12 | 2.21  | 1.74E-14 | 2.59E-12 | 3.16   | 1 | 1 | 0 | Y | RAB4A, member RAS oncogene family                                 |
| Sdr42e1       | 6.07E-16 | 2.41E-13 | 3.03  | 2.60E-14 | 5.24E-12 | 2.19  | 2.50E-03 | 5.81E-03 | 1.15   | 1 | 1 | 0 | Y | short chain dehydrogenase/reductase family 42E, member 1          |
| Impact        | 1.46E-07 | 1.58E-06 | 1.55  | 1.70E-11 | 9.38E-10 | 2.18  | 1.40E-13 | 1.46E-11 | 4.28   | 1 | 1 | 0 | Y | imprinted and ancient                                             |
| Irf1          | 2.05E-05 | 1.02E-04 | 1.68  | 4.64E-08 | 6.25E-07 | 2.18  | 2.38E-09 | 3.94E-08 | 3.67   | 1 | 1 | 0 | Y | interferon regulatory factor 1                                    |
| Pmepa1        | 6.88E-03 | 1.54E-02 | 1.22  | 1.60E-09 | 4.02E-08 | 2.13  | 2.61E-13 | 2.27E-11 | 6.49   | 1 | 1 | 0 | Y | prostate transmembrane protein, androgen induced 1                |
| LY96          | 4.42E-04 | 1.46E-03 | 1.30  | 8.53E-10 | 2.42E-08 | 2.06  | 4.49E-13 | 3.42E-11 | 5.17   | 1 | 1 | 0 | Y | lymphocyte antigen 96                                             |
| IL10ra        | 8.89E-05 | 3.61E-04 | 1.44  | 1.36E-08 | 2.24E-07 | 2.00  | 7.74E-11 | 2.20E-09 | 3.86   | 1 | 1 | 0 | Y | interleukin 10 receptor, alpha                                    |
| Edaradd       | 4.71E-03 | 1.12E-02 | 1.23  | 3.42E-09 | 7.42E-08 | 1.98  | 8.53E-13 | 5.77E-11 | 5.20   | 1 | 1 | 0 | Y | EDAR (ectodysplasin-A receptor)-associated death domain           |
| Dip2c         | 1.51E-04 | 5.72E-04 | 1.51  | 2.14E-07 | 2.28E-06 | 1.96  | 5.53E-09 | 8.04E-08 | 3.30   | 1 | 1 | 0 | Y | DIP2 disco-interacting protein 2 homolog C (Drosophila)           |
| Zbtb7b        | 4.62E-09 | 8.35E-08 | 1.57  | 4.37E-12 | 3.29E-10 | 1.96  | 1.93E-13 | 1.82E-11 | 3.06   | 1 | 1 | 0 | Y | zinc finger and BTB domain containing 7B                          |
| Unc119        | 6.25E-06 | 3.68E-05 | 1.31  | 1.00E-11 | 6.42E-10 | 1.95  | 7.50E-15 | 1.31E-12 | 4.36   | 1 | 1 | 0 | Y | unc-119 homolog (C. elegans)                                      |
| Stox2         | 6.06E-09 | 1.06E-07 | 1.47  | 7.84E-13 | 7.59E-11 | 1.94  | 7.91E-15 | 1.37E-12 | 3.37   | 1 | 1 | 0 | Y | storkhead box 2                                                   |
| Tmem229b      | 3.75E-07 | 3.48E-06 | 1.52  | 2.80E-10 | 9.70E-09 | 1.93  | 8.23E-12 | 3.51E-10 | 3.09   | 1 | 1 | 0 | Y | transmembrane protein 229B                                        |
| Atp10b        | 7.29E-07 | 6.05E-06 | 1.41  | 3.83E-11 | 1.84E-09 | 1.91  | 1.78E-13 | 1.72E-11 | 3.52   | 1 | 1 | 0 | Y | ATPase, class V, type 10B                                         |
| Al607873      | 4.21E-04 | 1.40E-03 | 1.50  | 1.16E-06 | 9.44E-06 | 1.91  | 4.34E-08 | 4.57E-07 | 3.07   | 1 | 1 | 0 | Y | expressed sequence Al607873                                       |
| Tgtp1         | 3.22E-03 | 8.12E-03 | 1.40  | 3.64E-06 | 2.49E-05 | 1.88  | 4.08E-08 | 4.32E-07 | 3.34   | 1 | 1 | 0 | Y | T-cell specific GTPase 1                                          |
| Gmfg          | 4.72E-04 | 1.55E-03 | 1.39  | 1.70E-07 | 1.89E-06 | 1.84  | 1.30E-09 | 2.34E-08 | 3.24   | 1 | 1 | 0 | Y | glia maturation factor, gamma                                     |
| Lsp1          | 3.53E-03 | 8.79E-03 | 1.39  | 4.61E-06 | 3.04E-05 | 1.82  | 5.63E-08 | 5.69E-07 | 3.15   | 1 | 1 | 0 | Y | lymphocyte specific 1                                             |
| Tgtp1         | 2.38E-03 | 6.28E-03 | 1.42  | 5.07E-06 | 3.29E-05 | 1.82  | 1.02E-07 | 9.46E-07 | 3.02   | 1 | 1 | 0 | Y | T-cell specific GTPase 1                                          |
| Sfmbt1        | 2.44E-04 | 8.75E-04 | 1.29  | 4.71E-09 | 5.95E-08 | 1.80  | 7.37E-12 | 3.19E-10 | 3.47   | 1 | 1 | 0 | Y | Scm-like with four mbt domains 1                                  |
| Gtbbp10       | 5.50E-03 | 1.28E-02 | 1.24  | 1.68E-07 | 1.87E-06 | 1.75  | 1.81E-10 | 4.50E-09 | 3.45   | 1 | 1 | 0 | Y | GTP-binding protein 10 (putative)                                 |
| Rap2a         | 6.98E-04 | 2.17E-03 | 1.17  | 4.67E-10 | 1.45E-08 | 1.60  | 1.57E-13 | 1.58E-11 | 3.00   | 1 | 1 | 0 | Y | RAS related protein 2A                                            |
| P2rx4         | 7.62E-03 | 1.68E-02 | -1.18 | 6.83E-08 | 8.72E-07 | -1.63 | 3.87E-11 | 1.25E-09 | -3.09  | 1 | 1 | 0 | Y | purinergic receptor 2X, ligand-gated ion channel 4                |
| Creb3l2       | 4.97E-03 | 1.17E-02 | -1.22 | 1.14E-07 | 1.35E-06 | -1.67 | 1.09E-10 | 2.95E-09 | -3.12  | 1 | 1 | 0 | Y | cAMP responsive element binding protein 3-like 2                  |
| Pgap1         | 2.97E-03 | 7.57E-03 | -1.38 | 3.49E-06 | 2.40E-05 | -1.80 | 4.12E-08 | 4.36E-07 | -3.06  | 1 | 1 | 0 | Y | post-GPI attachment to proteins 1                                 |
| Arhgdig       | 2.32E-06 | 1.58E-05 | -1.38 | 1.66E-10 | 6.30E-09 | -1.83 | 8.61E-13 | 5.77E-11 | -3.21  | 1 | 1 | 0 | Y | Rho GDP dissociation inhibitor (GDI) gamma                        |
| Tmem48        | 1.88E-04 | 6.96E-04 | -1.35 | 1.42E-08 | 2.33E-07 | -1.83 | 4.79E-11 | 1.48E-09 | -3.40  | 1 | 1 | 0 | Y | transmembrane protein 48                                          |
| Nr2c1         | 5.66E-08 | 7.07E-07 | -1.46 | 1.55E-11 | 8.64E-10 | -1.86 | 2.40E-13 | 2.12E-11 | -3.04  | 1 | 1 | 0 | Y | nuclear receptor subfamily 2, group C, member 1                   |
| Idh1          | 1.03E-03 | 3.04E-03 | -1.46 | 2.39E-06 | 1.75E-05 | -1.87 | 6.37E-08 | 6.32E-07 | -3.06  | 1 | 1 | 0 | Y | isocitrate dehydrogenase 1 (NADP+), soluble                       |
| Flrt3         | 3.45E-07 | 3.25E-06 | -1.39 | 1.04E-11 | 6.51E-10 | -1.91 | 3.65E-14 | 4.96E-12 | -3.58  | 1 | 1 | 0 | Y | fibronectin leucine rich transmembrane protein 3                  |
| Zdhhc23       | 3.24E-03 | 8.16E-03 | -1.29 | 5.08E-08 | 6.77E-07 | -1.94 | 4.52E-11 | 1.42E-09 | -4.38  | 1 | 1 | 0 | Y | zinc finger, DHHC domain containing 23                            |
| Cdh12         | 1.20E-06 | 9.16E-06 | -1.53 | 1.15E-09 | 3.08E-08 | -1.94 | 3.78E-11 | 1.23E-09 | -3.10  | 1 | 1 | 0 | Y | chromodomain protein, Y chromosome-like 2                         |
| Tjp2          | 5.11E-05 | 2.25E-04 | -1.32 | 2.41E-10 | 8.61E-09 | -1.94 | 2.36E-13 | 2.10E-11 | -4.22  | 1 | 1 | 0 | Y | tight junction protein 2                                          |
| Mag3          | 9.12E-03 | 1.96E-02 | -1.26 | 1.11E-07 | 1.32E-06 | -1.94 | 6.81E-11 | 1.98E-09 | -4.63  | 1 | 1 | 0 | Y | membrane associated guanylate kinase, WW and PDZ domain containin |
| Prs16         | 2.26E-04 | 8.16E-04 | -1.40 | 3.08E-08 | 4.44E-07 | -1.95 | 1.43E-10 | 3.74E-09 | -3.74  | 1 | 1 | 0 | Y | protease, serine, 16 (thymus)                                     |
| Pak1          | 5.34E-06 | 3.21E-05 | -1.44 | 2.78E-10 | 9.68E-09 | -2.02 | 1.12E-12 | 7.03E-11 | -3.99  | 1 | 1 | 0 | Y | p21 protein (Cdc42/Rac)-activated kinase 1                        |
| Cd1d1         | 2.03E-06 | 1.41E-05 | -1.63 | 2.76E-09 | 6.17E-08 | -2.11 | 1.16E-10 | 3.12E-09 | -3.51  | 1 | 1 | 0 | Y | CD1d1 antigen                                                     |
| Trove2        | 4.51E-07 | 4.06E-06 | -1.64 | 4.85E-10 | 1.49E-08 | -2.13 | 1.89E-11 | 6.91E-10 | -3.59  | 1 | 1 | 0 | Y | TROVE domain family, member 2                                     |
| Fam117b       | 1.52E-13 | 1.93E-11 | -1.78 | 6.24E-16 | 2.58E-13 | -2.15 | 1.31E-16 | 5.03E-14 | -3.14  | 1 | 1 | 0 | Y | family with sequence similarity 117, member B                     |
| Bcat2         | 5.91E-12 | 3.72E-10 | -1.85 | 4.56E-14 | 7.32E-12 | -2.19 | 1.78E-14 | 2.62E-12 | -3.07  | 1 | 1 | 0 | Y | branched chain aminotransferase 2, mitochondrial                  |
| Taf1a         | 3.76E-06 | 2.38E-05 | -1.38 | 5.65E-12 | 4.10E-10 | -2.22 | 4.23E-15 | 7.75E-13 | -5.75  | 1 | 1 | 0 | Y | TATA box binding protein (Tbp)-associated factor, RNA polymerase  |
| Nap1l3        | 1.41E-08 | 2.17E-07 | -1.70 | 1.16E-11 | 6.96E-10 | -2.25 | 4.36E-13 | 3.37E-11 | -3.90  | 1 | 1 | 0 | Y | nucleosome assembly protein 1-like 3                              |
| Atp2b4        | 5.24E-10 | 1.35E-08 | -1.71 | 1.97E-13 | 2.47E-11 | -2.31 | 4.52E-15 | 8.18E-13 | -4.26  | 1 | 1 | 0 | Y | ATPase, Ca++ transporting, plasma membrane 4                      |
| Arhgap42      | 2.11E-03 | 5.65E-03 | -1.73 | 1.43E-05 | 8.01E-05 | -2.34 | 8.26E-07 | 5.62E-06 | -4.29  | 1 | 1 | 0 | Y | Rho GTPase activating protein 42                                  |
| 2510002D24Rik | 1.01E-06 | 7.92E-06 | -1.69 | 4.06E-10 | 1.31E-08 | -2.37 | 6.96E-12 | 3.03E-10 | -4.67  | 1 | 1 | 0 | Y | RIKEN cDNA 2510002D24 gene                                        |
| Rreb1         | 1.17E-07 | 1.30E-06 | -1.56 | 3.52E-12 | 2.79E-10 | -2.38 | 1.32E-14 | 2.08E-12 | -5.49  | 1 | 1 | 0 | Y | ras responsive element binding protein 1                          |
| Tmem180       | 1.07E-10 | 3.85E-09 | -2.11 | 2.78E-12 | 2.28E-10 | -2.40 | 4.36E-12 | 2.06E-10 | -3.13  | 1 | 1 | 0 | Y | transmembrane protein 180                                         |
| D17H6556E-5   | 3.15E-04 | 1.09E-03 | -1.71 | 4.36E-07 | 4.11E-06 | -2.44 | 9.75E-09 | 1.28E-07 | -4.96  | 1 | 1 | 0 | Y | DNA segment, Chr 17, human D6556E5                                |
| Mcee          | 3.15E-12 | 2.16E-10 | -3.18 | 3.20E-11 | 1.57E-09 | -2.46 | 7.16E-05 | 2.72E-04 | -1.47  | 1 | 1 | 0 | Y | methylmalonyl CoA epimerase                                       |
| Mt2           | 2.06E-07 | 2.11E-06 | -2.10 | 4.60E-09 | 9.43E-08 | -2.47 | 3.99E-09 | 6.12E-08 | -3.41  | 1 | 1 | 0 | Y | metallothionein 2                                                 |
| Vcl           | 8.22E-08 | 9.63E-07 | -2.18 | 3.15E-09 | 6.96E-08 | -2.47 | 5.84E-09 | 8.38E-08 | -3.20  | 1 | 1 | 0 | Y | vinculin                                                          |
| Gipc2         | 2.76E-04 | 9.72E-04 | -1.30 | 1.93E-11 | 1.05E-09 | -2.48 | 3.62E-15 | 6.95E-13 | -8.93  | 1 | 1 | 0 | Y | GIPC PDZ domain containing family, member 2                       |
| Rnpepl1       | 2.82E-13 | 3.20E-11 | -1.90 | 4.09E-16 | 1.97E-13 | -2.49 | 3.17E-17 | 1.78E-14 | -4.27  | 1 | 1 | 0 | Y | arginyl aminopeptidase (aminopeptidase B)-like 1                  |
| Egr1          | 2.88E-15 | 7.55E-13 | -3.13 | 1.45E-14 | 3.26E-12 | -2.55 | 4.49E-09 | 6.74E-08 | -1.68  | 1 | 1 | 0 | Y | early growth response 1                                           |
| Vcan          | 8.99E-04 | 2.70E-03 | -1.12 | 4.33E-16 | 1.97E-13 | -2.56 | 9.54E-21 | 7.51E-17 | -13.30 | 1 | 1 | 0 | Y | versican                                                          |
| Cdh17         | 8.49E-10 | 2.02E-08 | -2.13 | 1.06E-11 | 6.56E-10 | -2.57 | 6.23E-12 | 2.75E-10 | -3.71  | 1 | 1 | 0 | Y | cadherin 17                                                       |
| 1700080I05Rik | 2.93E-12 | 2.10E-10 | -3.13 | 1.13E-11 | 6.90E-10 | -2.58 | 7.36E-07 | 5.09E-06 | -1.76  | 1 | 1 | 0 | Y | RIKEN cDNA 1700080I05 gene                                        |
| Ica1          | 1.14E-05 | 6.18E-05 | -1.36 | 8.45E-13 | 8.05E-11 | -2.60 | 2.09E-16 | 7.52E-14 | -9.52  | 1 | 1 | 0 | Y | islet cell autotigen 1                                            |
| Nr4a2         | 5.14E-11 | 2.14E-09 | -3.28 | 3.08E-10 | 1.04E-08 | -2.60 | 5.48E-05 | 2.14E-04 | -1.63  | 1 | 1 | 0 | Y | nuclear receptor subfamily 4, group A, member 2                   |
| H             |          |          |       |          |          |       |          |          |        |   |   |   |   |                                                                   |

|               |          |          |        |          |          |        |          |          |         |   |   |   |   |                                                                  |
|---------------|----------|----------|--------|----------|----------|--------|----------|----------|---------|---|---|---|---|------------------------------------------------------------------|
| Plin2         | 9.81E-12 | 5.68E-10 | -2.74  | 2.10E-13 | 2.55E-11 | -3.31  | 2.72E-13 | 2.33E-11 | -4.84   | 1 | 1 | 0 | Y | perilipin 2                                                      |
| Ernm          | 5.09E-08 | 6.49E-07 | -2.00  | 6.89E-12 | 4.85E-10 | -3.31  | 6.60E-14 | 7.94E-12 | -9.10   | 1 | 1 | 0 | Y | ermin, ERM-like protein                                          |
| Neur3         | 2.21E-06 | 1.51E-05 | -1.94  | 2.37E-10 | 8.50E-09 | -3.34  | 1.58E-12 | 9.15E-11 | -9.92   | 1 | 1 | 0 | Y | neutralized homolog 3 homolog (Drosophila)                       |
| Tmem5         | 4.00E-15 | 9.88E-13 | -3.03  | 2.54E-16 | 1.52E-13 | -3.38  | 1.69E-15 | 3.60E-13 | -4.22   | 1 | 1 | 1 | Y | transmembrane protein 5                                          |
| Ccr5          | 6.34E-12 | 3.92E-10 | -3.38  | 1.41E-12 | 1.23E-10 | -3.43  | 6.78E-11 | 1.97E-09 | -3.54   | 1 | 1 | 1 | Y | chemokine (C-C motif) receptor 5                                 |
| Ccr5          | 6.34E-12 | 3.92E-10 | -3.38  | 1.41E-12 | 1.23E-10 | -3.43  | 6.78E-11 | 1.97E-09 | -3.54   | 1 | 1 | 1 | Y | chemokine (C-C motif) receptor 5                                 |
| Isyna1        | 8.27E-13 | 7.43E-11 | -3.91  | 8.45E-13 | 8.05E-11 | -3.46  | 1.22E-09 | 2.22E-08 | -2.72   | 1 | 1 | 0 | Y | myo-inositol 1-phosphate synthase A1                             |
| 4930523C07Rik | 2.45E-12 | 1.81E-10 | -4.28  | 6.13E-12 | 4.38E-10 | -3.47  | 1.00E-07 | 9.28E-07 | -2.29   | 1 | 1 | 0 | Y | RIKEN cDNA 4930523C07 gene                                       |
| Airn          | 1.94E-10 | 6.23E-09 | -3.06  | 1.04E-11 | 6.51E-10 | -3.50  | 4.25E-11 | 1.36E-09 | -4.59   | 1 | 1 | 1 | Y | antisense lgf2r RNA                                              |
| Klrg1         | 2.14E-05 | 1.03E-04 | -2.44  | 1.17E-07 | 1.38E-06 | -3.50  | 1.35E-08 | 1.69E-07 | -7.25   | 1 | 1 | 0 | Y | killer cell lectin-like receptor subfamily G, member 1           |
| Fgl2          | 4.88E-11 | 2.08E-09 | -2.78  | 5.69E-13 | 6.01E-11 | -3.56  | 3.38E-13 | 2.72E-11 | -5.85   | 1 | 1 | 0 | Y | fibrinogen-like protein 2                                        |
| Nefh          | 8.11E-11 | 3.09E-09 | -2.42  | 1.08E-13 | 1.45E-11 | -3.57  | 7.09E-15 | 1.25E-12 | -7.80   | 1 | 1 | 0 | Y | neurofilament, heavy polypeptide                                 |
| H2-M10.1      | 1.63E-03 | 4.52E-03 | -1.33  | 7.19E-12 | 5.01E-10 | -3.59  | 5.63E-16 | 1.50E-13 | -26.19  | 1 | 1 | 0 | Y | histocompatibility 2, M region locus 10.1                        |
| Inpp5d        | 4.14E-13 | 4.28E-11 | -2.81  | 4.56E-15 | 1.25E-12 | -3.60  | 2.77E-15 | 5.45E-13 | -5.92   | 1 | 1 | 0 | Y | inositol polyphosphate-5-phosphatase D                           |
| Lmp           | 9.81E-15 | 2.04E-12 | -4.62  | 3.28E-14 | 6.04E-12 | -3.62  | 2.05E-09 | 3.46E-08 | -2.23   | 1 | 1 | 0 | Y | lymphoid-restricted membrane protein                             |
| Pecr          | 1.20E-11 | 6.63E-10 | -3.07  | 4.09E-13 | 4.57E-11 | -3.64  | 9.75E-13 | 6.37E-11 | -5.12   | 1 | 1 | 1 | Y | peroxisomal trans-2-enoyl-CoA reductase                          |
| Gpr128        | 7.18E-04 | 2.23E-03 | -1.14  | 2.25E-17 | 2.05E-14 | -3.65  | 3.93E-22 | 6.19E-18 | -37.30  | 1 | 1 | 0 | Y | G protein-coupled receptor 128                                   |
| Itm2a         | 2.13E-08 | 3.10E-07 | -1.87  | 1.47E-13 | 1.90E-11 | -3.75  | 2.72E-16 | 9.28E-14 | -15.09  | 1 | 1 | 0 | Y | integral membrane protein 2A                                     |
| Ceacam1       | 1.90E-09 | 4.02E-08 | -3.17  | 7.70E-11 | 3.37E-09 | -3.76  | 1.94E-10 | 4.77E-09 | -5.28   | 1 | 1 | 1 | Y | carcinoembryonic antigen-related cell adhesion molecule 1 //     |
| Fam78b        | 8.95E-10 | 2.12E-08 | -2.10  | 5.70E-14 | 8.74E-12 | -3.78  | 3.88E-16 | 1.13E-13 | -12.19  | 1 | 1 | 0 | Y | family with sequence similarity 78, member B                     |
| Igf2r         | 5.18E-18 | 6.38E-15 | -4.22  | 4.24E-18 | 6.68E-15 | -3.79  | 4.60E-15 | 8.23E-13 | -3.06   | 1 | 1 | 1 | Y | insulin-like growth factor 2 receptor                            |
| Ptprcap       | 1.77E-16 | 1.05E-13 | -4.85  | 4.22E-16 | 1.97E-13 | -3.90  | 9.61E-12 | 3.92E-10 | -2.51   | 1 | 1 | 0 | Y | protein tyrosine phosphatase, receptor type, C polypeptide-asso  |
| Insf6         | 2.56E-12 | 1.88E-10 | -5.34  | 1.36E-11 | 7.86E-10 | -3.91  | 2.67E-06 | 1.53E-05 | -2.09   | 1 | 1 | 0 | Y | insulin-like 6                                                   |
| Syce2         | 3.42E-08 | 4.66E-07 | -2.80  | 1.82E-10 | 6.78E-09 | -3.96  | 3.60E-11 | 1.18E-09 | -7.92   | 1 | 1 | 0 | Y | synaptonemal complex central element protein 2                   |
| Ccdc104       | 2.86E-13 | 3.22E-11 | -4.20  | 1.06E-13 | 1.45E-11 | -4.06  | 1.56E-11 | 5.89E-10 | -3.80   | 1 | 1 | 1 | Y | coiled-coil domain containing 104                                |
| Atp2a3        | 1.24E-13 | 1.63E-11 | -3.10  | 1.32E-15 | 4.77E-13 | -4.08  | 7.74E-16 | 1.97E-13 | -7.07   | 1 | 1 | 1 | Y | ATPase, Ca++ transporting, ubiquitous                            |
| Me1           | 9.04E-07 | 7.21E-06 | -1.46  | 2.05E-15 | 6.70E-13 | -4.20  | 2.31E-19 | 3.31E-16 | -34.76  | 1 | 1 | 0 | Y | malic enzyme 1, NADP(+)-dependent, cytosolic                     |
| Aldoc         | 1.93E-07 | 2.00E-06 | -3.13  | 2.52E-09 | 5.75E-08 | -4.24  | 1.18E-09 | 2.16E-08 | -7.74   | 1 | 1 | 1 | Y | aldolase C, fructose-bisphosphate                                |
| Cstb          | 7.07E-14 | 1.05E-11 | -4.97  | 7.03E-14 | 1.03E-11 | -4.32  | 1.07E-10 | 2.92E-09 | -3.27   | 1 | 1 | 1 | Y | cystatin B                                                       |
| Me1           | 2.35E-06 | 1.59E-05 | -1.46  | 3.58E-15 | 1.05E-12 | -4.43  | 3.56E-19 | 4.67E-16 | -40.91  | 1 | 1 | 0 | Y | malic enzyme 1, NADP(+)-dependent, cytosolic                     |
| Casd1         | 2.91E-11 | 1.36E-09 | -2.44  | 3.70E-15 | 1.06E-12 | -4.49  | 4.17E-17 | 2.05E-14 | -15.29  | 1 | 1 | 0 | Y | CAS1 domain containing 1                                         |
| Tmbim4        | 5.42E-13 | 5.28E-11 | -5.36  | 6.50E-13 | 6.59E-11 | -4.54  | 1.45E-09 | 2.57E-08 | -3.26   | 1 | 1 | 1 | Y | transmembrane BAX inhibitor motif containing 4                   |
| Lass6         | 1.81E-10 | 5.92E-09 | -2.08  | 1.14E-15 | 4.24E-13 | -4.60  | 2.27E-18 | 2.31E-15 | -22.40  | 1 | 1 | 0 | Y | LAG1 homolog, ceramide synthase 6                                |
| Sema6d        | 2.70E-07 | 2.66E-06 | -3.86  | 1.45E-08 | 2.37E-07 | -4.68  | 3.80E-08 | 4.06E-07 | -6.86   | 1 | 1 | 1 | Y | sema domain, transmembrane domain (TM), and cytoplasmic domain,  |
| Wls           | 3.83E-13 | 4.08E-11 | -4.62  | 7.77E-14 | 1.12E-11 | -4.74  | 3.42E-12 | 1.68E-10 | -5.01   | 1 | 1 | 1 | Y | wntless homolog (Drosophila)                                     |
| Phyh          | 5.23E-12 | 3.35E-10 | -4.49  | 7.95E-13 | 7.65E-11 | -4.76  | 1.95E-11 | 7.06E-10 | -5.36   | 1 | 1 | 1 | Y | phytanoyl-CoA hydroxylase                                        |
| Fam38a        | 6.94E-17 | 4.60E-14 | -4.97  | 2.19E-17 | 2.05E-14 | -4.87  | 2.62E-15 | 5.29E-13 | -4.66   | 1 | 1 | 1 | Y | family with sequence similarity 38, member A                     |
| Rgs2          | 4.84E-08 | 6.19E-07 | -3.33  | 2.30E-10 | 8.34E-09 | -5.07  | 3.99E-11 | 1.28E-09 | -11.75  | 1 | 1 | 1 | Y | regulator of G-protein signaling 2                               |
| Fam5c         | 4.19E-15 | 1.00E-12 | -9.18  | 6.46E-14 | 9.65E-12 | -5.37  | 3.92E-06 | 2.13E-05 | -1.84   | 1 | 1 | 0 | Y | family with sequence similarity 5, member C                      |
| A930038C07Rik | 2.77E-10 | 8.24E-09 | -4.35  | 9.30E-12 | 6.11E-10 | -5.50  | 1.97E-11 | 7.10E-10 | -8.75   | 1 | 1 | 1 | Y | RIKEN cDNA A930038C07 gene                                       |
| Peci          | 1.79E-18 | 2.45E-15 | -6.33  | 1.30E-18 | 2.50E-15 | -5.59  | 1.07E-15 | 2.55E-13 | -4.36   | 1 | 1 | 1 | Y | peroxisomal delta3, delta2-enoyl-Coenzyme A isomerase            |
| Tmem159       | 1.20E-15 | 4.06E-13 | -9.49  | 6.81E-15 | 1.71E-12 | -6.22  | 3.58E-09 | 5.54E-08 | -2.67   | 1 | 1 | 0 | Y | transmembrane protein 159                                        |
| Fam38a        | 1.19E-15 | 4.06E-13 | -6.52  | 3.90E-16 | 1.97E-13 | -6.33  | 4.87E-14 | 6.14E-12 | -5.97   | 1 | 1 | 1 | Y | family with sequence similarity 38, member A                     |
| Mir1          | 3.94E-16 | 1.74E-13 | -5.29  | 1.85E-17 | 1.89E-14 | -6.47  | 7.93E-17 | 3.29E-14 | -9.70   | 1 | 1 | 1 | Y | major histocompatibility complex, class I-related                |
| Slc2a3        | 2.79E-16 | 1.34E-13 | -8.67  | 4.67E-16 | 1.97E-13 | -6.72  | 3.45E-12 | 1.69E-10 | -4.03   | 1 | 1 | 1 | Y | solute carrier family 2 (facilitated glucose transporter), membe |
| Serpine2      | 2.61E-19 | 6.19E-16 | -8.68  | 3.28E-19 | 7.11E-16 | -6.98  | 1.16E-15 | 2.73E-13 | -4.51   | 1 | 1 | 1 | Y | serine (or cysteine) peptidase inhibitor, clade E, member 2 //   |
| Hadh          | 5.08E-14 | 8.04E-12 | -4.51  | 3.04E-16 | 1.71E-13 | -6.99  | 9.61E-17 | 3.78E-14 | -16.77  | 1 | 1 | 1 | Y | hydroxyacyl-Coenzyme A dehydrogenase                             |
| Slc27a6       | 1.48E-09 | 3.24E-08 | -4.74  | 1.71E-11 | 9.41E-10 | -7.02  | 9.00E-12 | 3.74E-10 | -15.39  | 1 | 1 | 1 | Y | solute carrier family 27 (fatty acid transporter), member 6      |
| Macc1         | 5.86E-12 | 3.70E-10 | -4.00  | 5.45E-15 | 1.43E-12 | -7.67  | 2.77E-16 | 9.28E-14 | -28.26  | 1 | 1 | 1 | Y | metastasis associated in colon cancer 1                          |
| Rgs18         | 2.11E-11 | 1.05E-09 | -5.14  | 1.78E-13 | 2.29E-11 | -7.98  | 7.49E-14 | 8.55E-12 | -19.24  | 1 | 1 | 1 | Y | regulator of G-protein signaling 18                              |
| Sema3d        | 1.29E-12 | 1.07E-10 | -4.35  | 1.39E-15 | 4.82E-13 | -8.45  | 8.22E-17 | 3.32E-14 | -31.97  | 1 | 1 | 1 | Y | sema domain, immunoglobulin domain (Ig), short basic domain, sec |
| Rny1          | 5.86E-06 | 3.48E-05 | -5.92  | 6.95E-08 | 8.86E-07 | -10.22 | 2.09E-08 | 2.45E-07 | -30.43  | 1 | 1 | 1 | Y | RNA, Y1 small cytoplasmic, Ro-associated                         |
| Klra9         | 4.01E-15 | 9.88E-13 | -5.88  | 1.73E-17 | 1.87E-14 | -10.31 | 3.93E-18 | 3.44E-15 | -31.74  | 1 | 1 | 1 | Y | killer cell lectin-like receptor subfamily A, member 9           |
| Fam38a        | 1.01E-19 | 2.90E-16 | -11.99 | 2.69E-20 | 1.17E-16 | -11.91 | 2.35E-18 | 2.31E-15 | -11.76  | 1 | 1 | 1 | Y | family with sequence similarity 38, member A                     |
| Scppdh        | 2.43E-15 | 6.71E-13 | -18.11 | 1.15E-15 | 4.24E-13 | -16.13 | 3.16E-13 | 2.59E-11 | -12.79  | 1 | 1 | 1 | Y | saccharopine dehydrogenase (putative)                            |
| Lxn           | 5.13E-16 | 2.11E-13 | -13.31 | 4.44E-17 | 3.35E-14 | -16.21 | 4.89E-16 | 1.33E-13 | -24.05  | 1 | 1 | 1 | Y | latexin                                                          |
| Gem           | 1.52E-18 | 2.45E-15 | -36.01 | 5.37E-18 | 7.76E-15 | -20.21 | 5.40E-13 | 3.90E-11 | -6.37   | 1 | 1 | 1 | Y | GTP binding protein (gene overexpressed in skeletal muscle)      |
| Nrn1          | 2.87E-19 | 6.19E-16 | -30.35 | 1.52E-20 | 8.78E-17 | -44.31 | 8.12E-20 | 1.83E-16 | -94.44  | 1 | 1 | 1 | Y | neuritin 1                                                       |
| Klra5         | 7.62E-15 | 1.66E-12 | -39.08 | 1.90E-16 | 1.22E-13 | -73.16 | 3.32E-16 | 1.05E-13 | -256.40 | 1 | 1 | 1 | Y | killer cell lectin-like receptor, subfamily A, member 5          |

**Supplemental  
Table 3  
Lineage**

| Lineage            |              | CD8y13 T cell clones |                   | Score      | gene title                                             |
|--------------------|--------------|----------------------|-------------------|------------|--------------------------------------------------------|
|                    |              | mRNA signal          |                   |            |                                                        |
|                    |              | <u>Mean 8sAg1</u>    | <u>Mean 8sAg3</u> |            |                                                        |
|                    | CD4 T cells  | 230*                 | 1398*             | + / ++     | CD4 antigen                                            |
|                    | CD8 T cells  | 5256                 | 4938              | +++ / +++  | CD8 antigen, beta chain 1                              |
|                    | NK/NKT cells | 27                   | 16                | 0 / 0      | killer cell lectin-like receptor subfamily B member 1c |
|                    | B cells      | 20                   | 16                | 0 / 0      | CD79A antigen (immunoglobulin associated alpha)        |
| <b>Cytokine</b>    | Th1          | 1675                 | 1031              | ++ / ++    | T-box 21 (T-bet)                                       |
|                    | Th2          | 1052                 | 1217              | ++ / ++    | GATA binding protein 3 (Gata3)                         |
|                    | Th17         | 90                   | 62                | 0 / 0      | RAR-related orphan receptor (RORyT)                    |
|                    | Th22         | 77                   | 38                | 0 / 0      | aryl-hydrocarbon receptor (Ahr)                        |
|                    | CD4y13       | 69                   | 75                | 0 / 0      | four and a half LIM domains 2 (Fhl2)                   |
|                    | ?            | 43                   | 604               | 0 / +      | eomesodermin (Eomes)                                   |
| <b>Trm</b>         | Klrg1        | 56                   | 1128              | 0 / ++     | killer cell lectin-like receptor subfamilyG, member 1  |
|                    | Klf2         | 188                  | 195               | + / +      | Kruppel-like factor 2 (lung)                           |
|                    | Hnf1a        | 744                  | 760               | + / +      | HNF1 homeobox A                                        |
|                    | S1pr1        | 93                   | 61                | 0 / 0      | sphingosine-1-phosphate receptor 1                     |
|                    | Ccr7         | 218                  | 122               | + / 0      | chemokine (C-C motif) receptor 7                       |
|                    | Prdm1        | 1024                 | 1052              | ++ / ++    | PR domain containing 1, with ZNF domain (Blimp-1)      |
|                    | Rgs1         | 385                  | 1332              | + / ++     | regulator of G-protein signaling 1                     |
|                    | Rgs2         | 104                  | 54                | 0 / 0      | regulator of G-protein signaling 2                     |
|                    | Cd69         | 442                  | 1629              | + / ++     | CD69 antigen                                           |
|                    | Cd44         | 803                  | 63                | + / 0      | CD44 antigen                                           |
|                    | Itgal        | 8659                 | 6472              | ++++ / +++ | integrin alpha L                                       |
|                    | Itgb7        | 2134                 | 95                | ++ / 0     | integrin beta 7                                        |
|                    | Itga1        | 4837                 | 5752              | +++ / +++  | integrin alpha 1                                       |
|                    | Itgae        | 46                   | 46                | 0 / 0      | integrin alpha E, epithelial-associated                |
| <b>Treg</b>        | Cd27         | 57                   | 45                | 0 / 0      | CD27 antigen                                           |
|                    | IL2ra        | 6936                 | 8841              | +++ / ++++ | interleukin 2 receptor, alpha chain                    |
|                    | Foxp3        | 67                   | 71                | 0 / 0      | forkhead box P3                                        |
|                    | Ctla4        | 491                  | 455               | + / +      | cytotoxic T-lymphocyte-associated protein 4            |
| <b>Th22</b>        | Ahr          | 77                   | 95                | 0 / 0      | aryl-hydrocarbon receptor (Ahr)                        |
|                    | Foxo4        | 196                  | 119               | + / 0      | forkhead box O4                                        |
|                    | Bnc2         | 30                   | 32                | 0 / 0      | basonudin2                                             |
| <b>Cm Effector</b> | Casd1        | 25                   | 17                | 0 / 0      | CAS1 domain containing 1                               |
|                    | Plac8        | 29                   | 23                | 0 / 0      | placenta-specific 8                                    |

<sup>a</sup>Scores are defined as follows: <150 arbitrary units (AU) = 0, 150 to 999 AU +, 1,000 to 2,499 AU ++, 2,500 to 7,499 AU +++ and 7,500 to 10,000 AU ++++.

\* no cell surface expression
